# Supplementary material for: Archaeal Diversity and CO2Fixers in Carbonate-/Siliciclastic-Rock Groundwater Ecosystems
Source: Hindawi journal article supplement (doi:10.1155/2017/2136287), 2017-01-01
Supplement: f1 [file 2136287.f1.pdf]

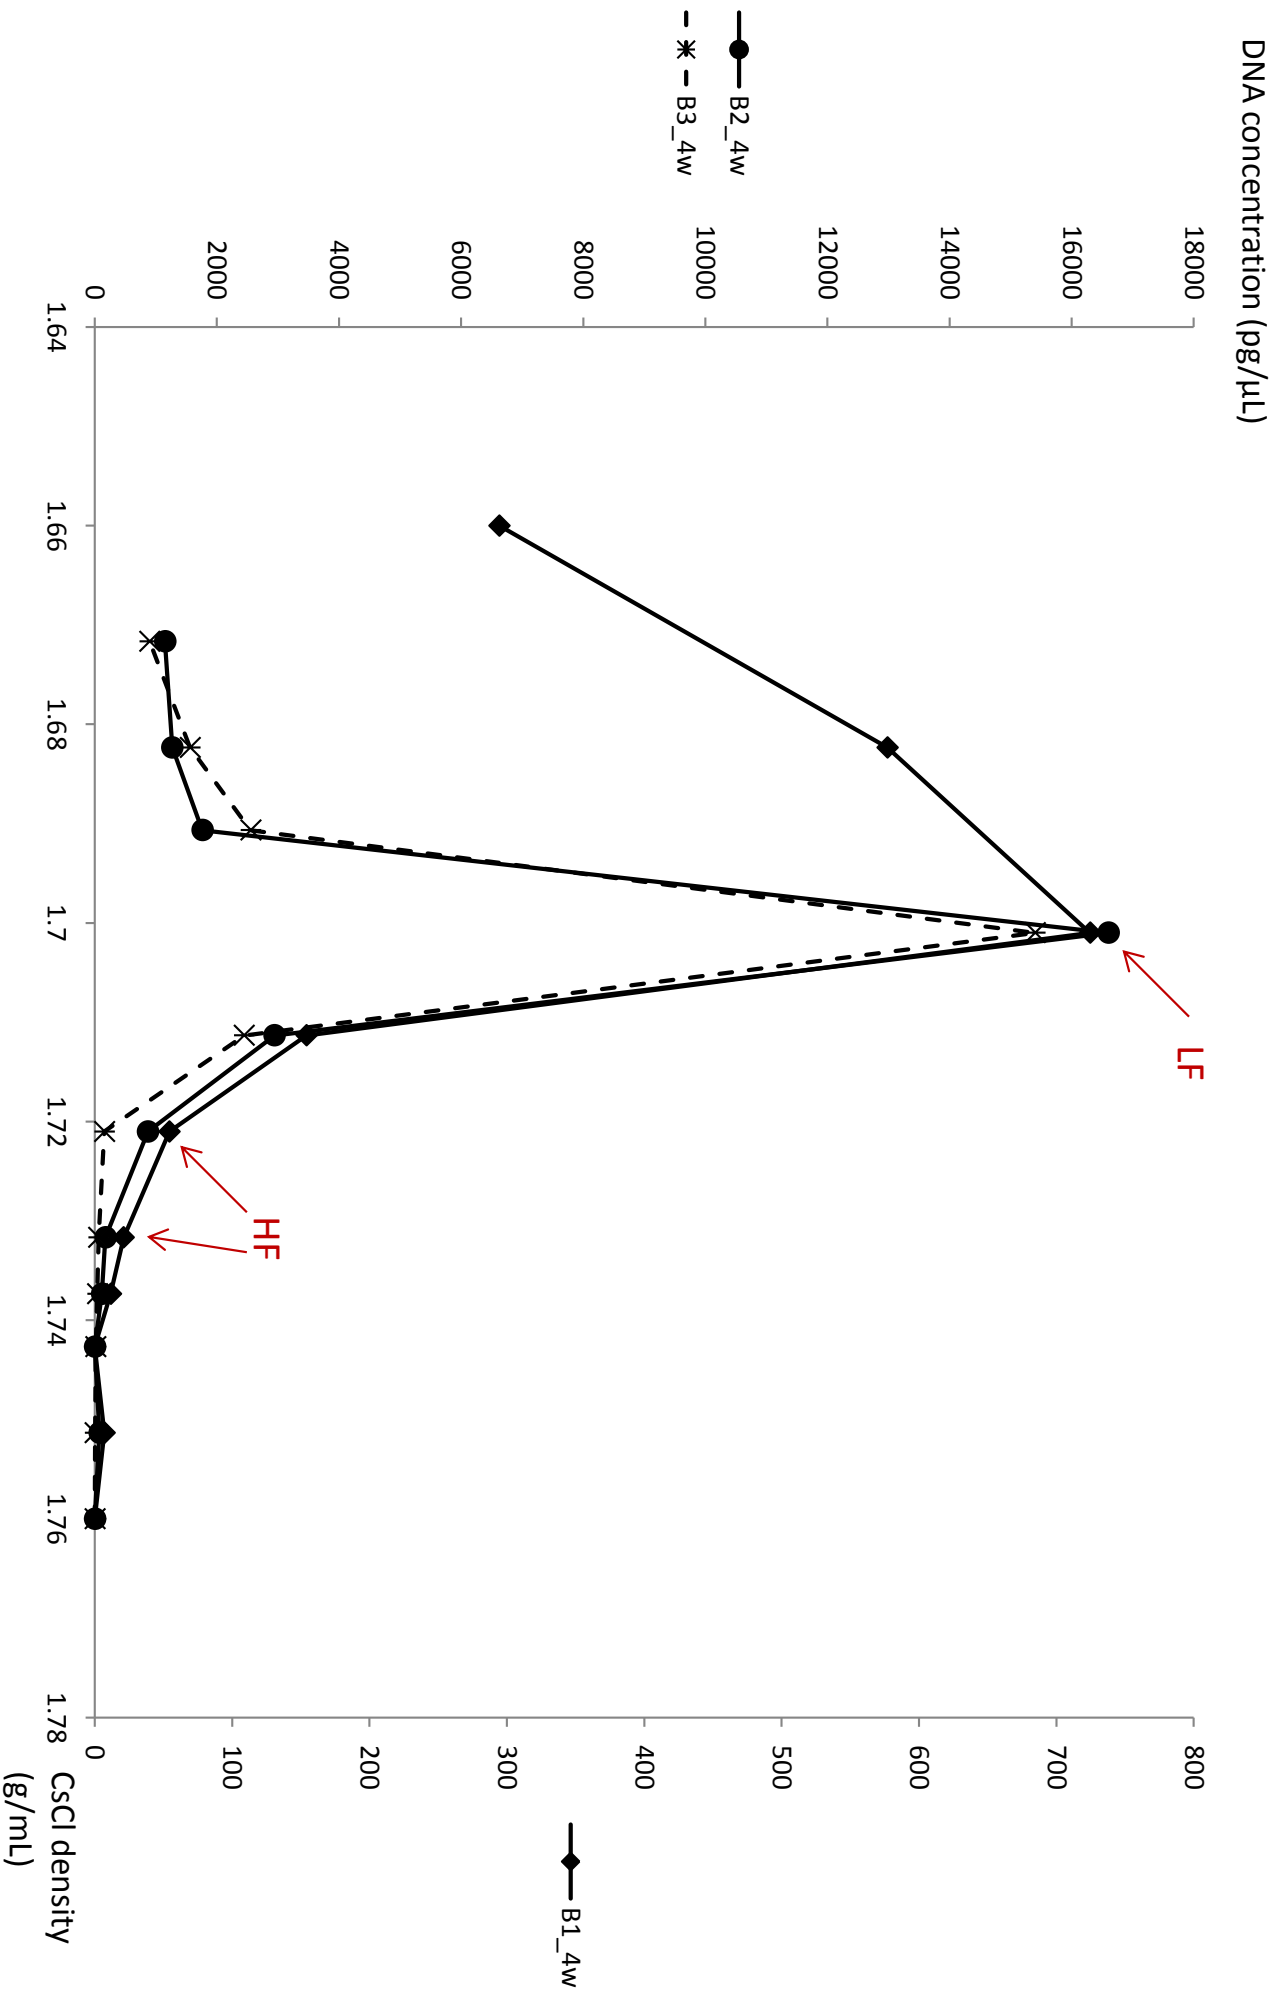

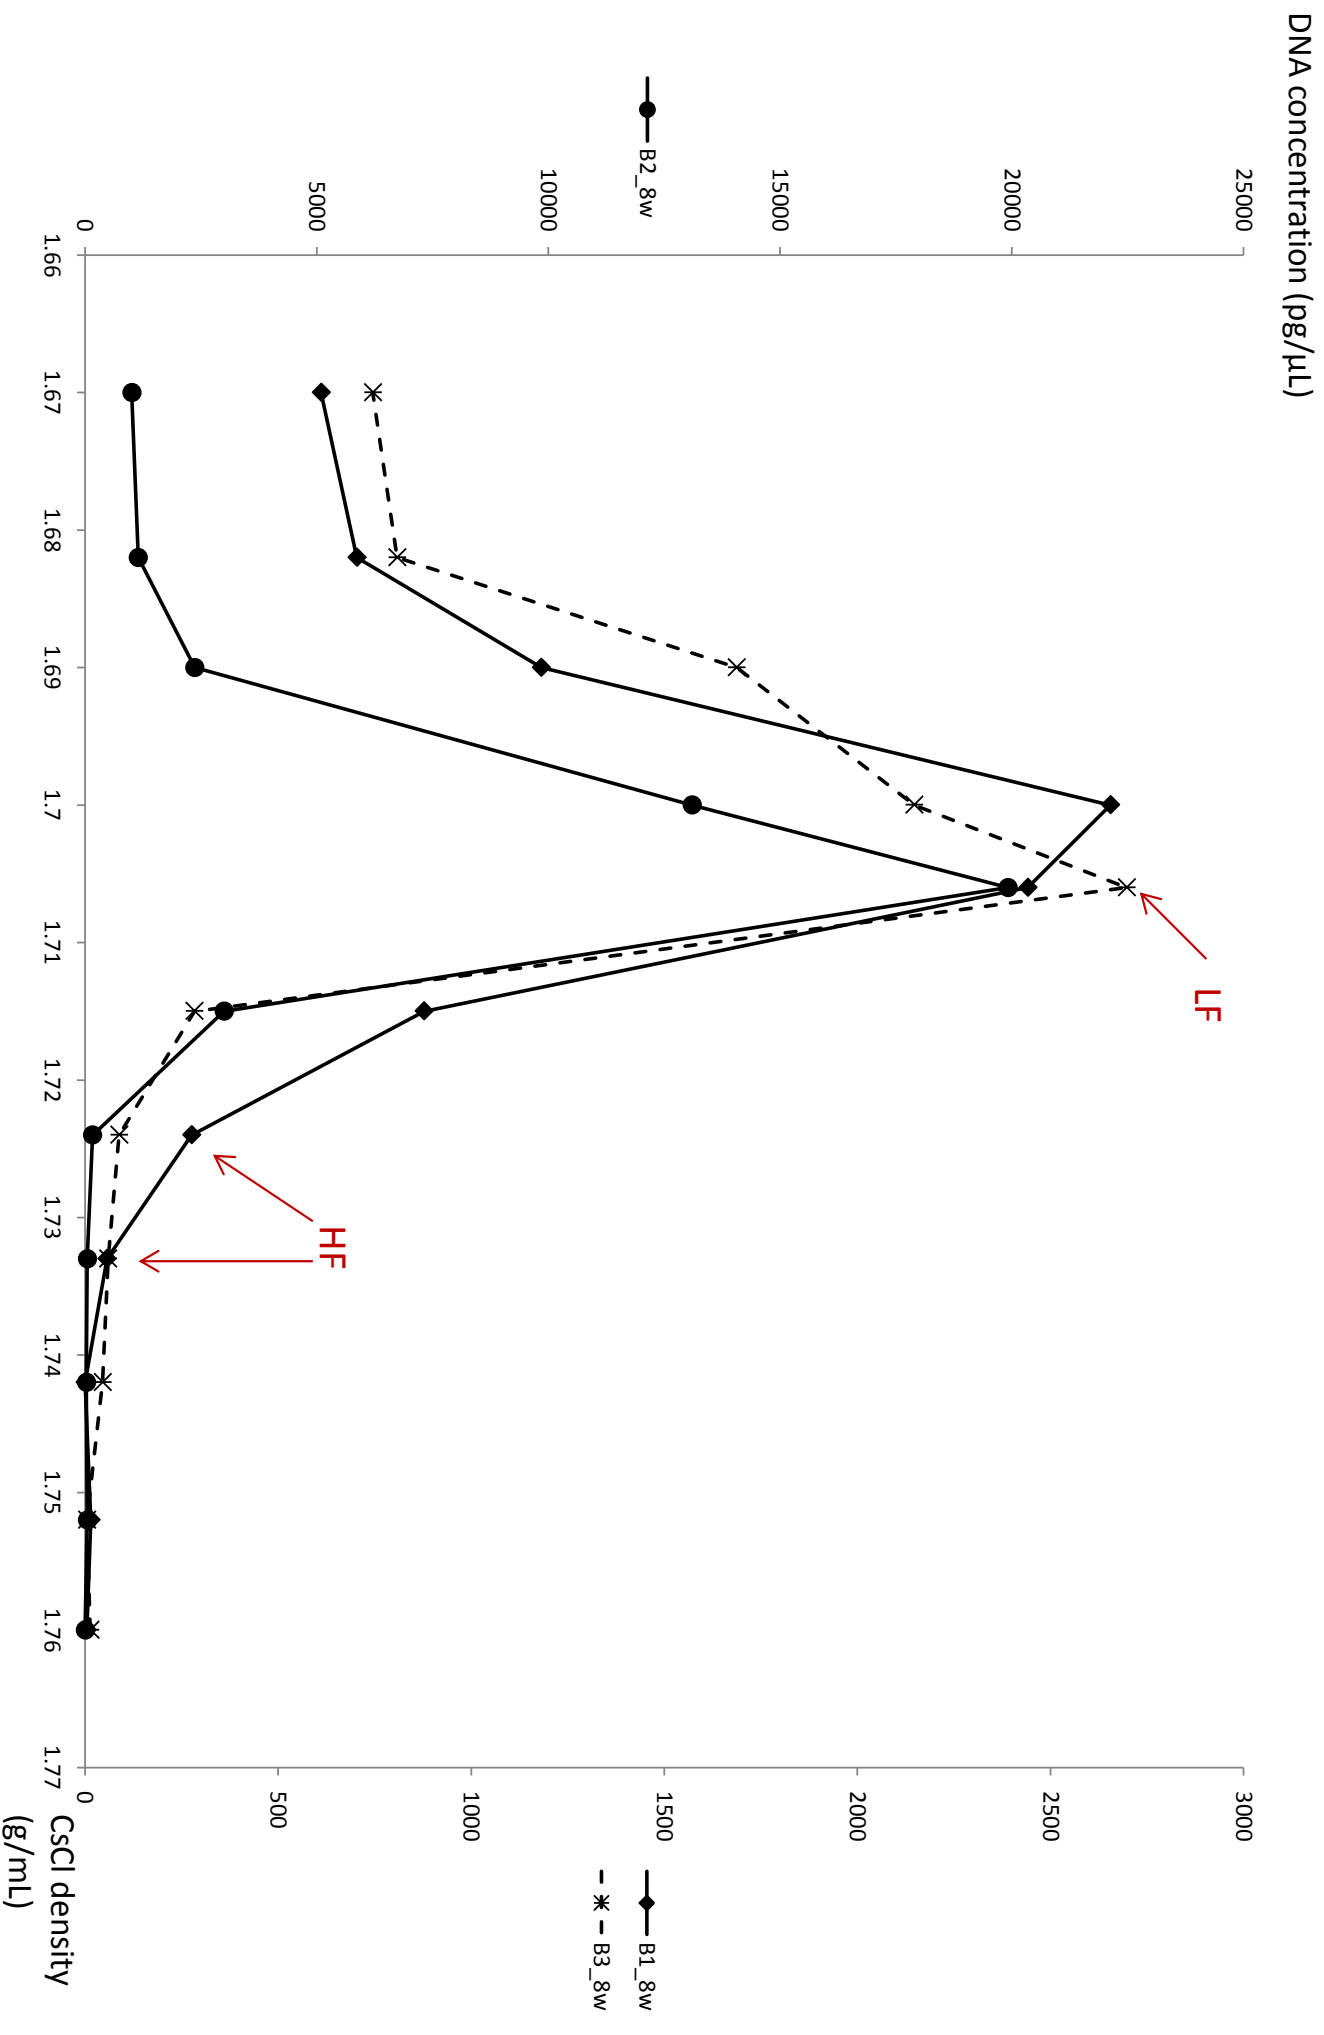

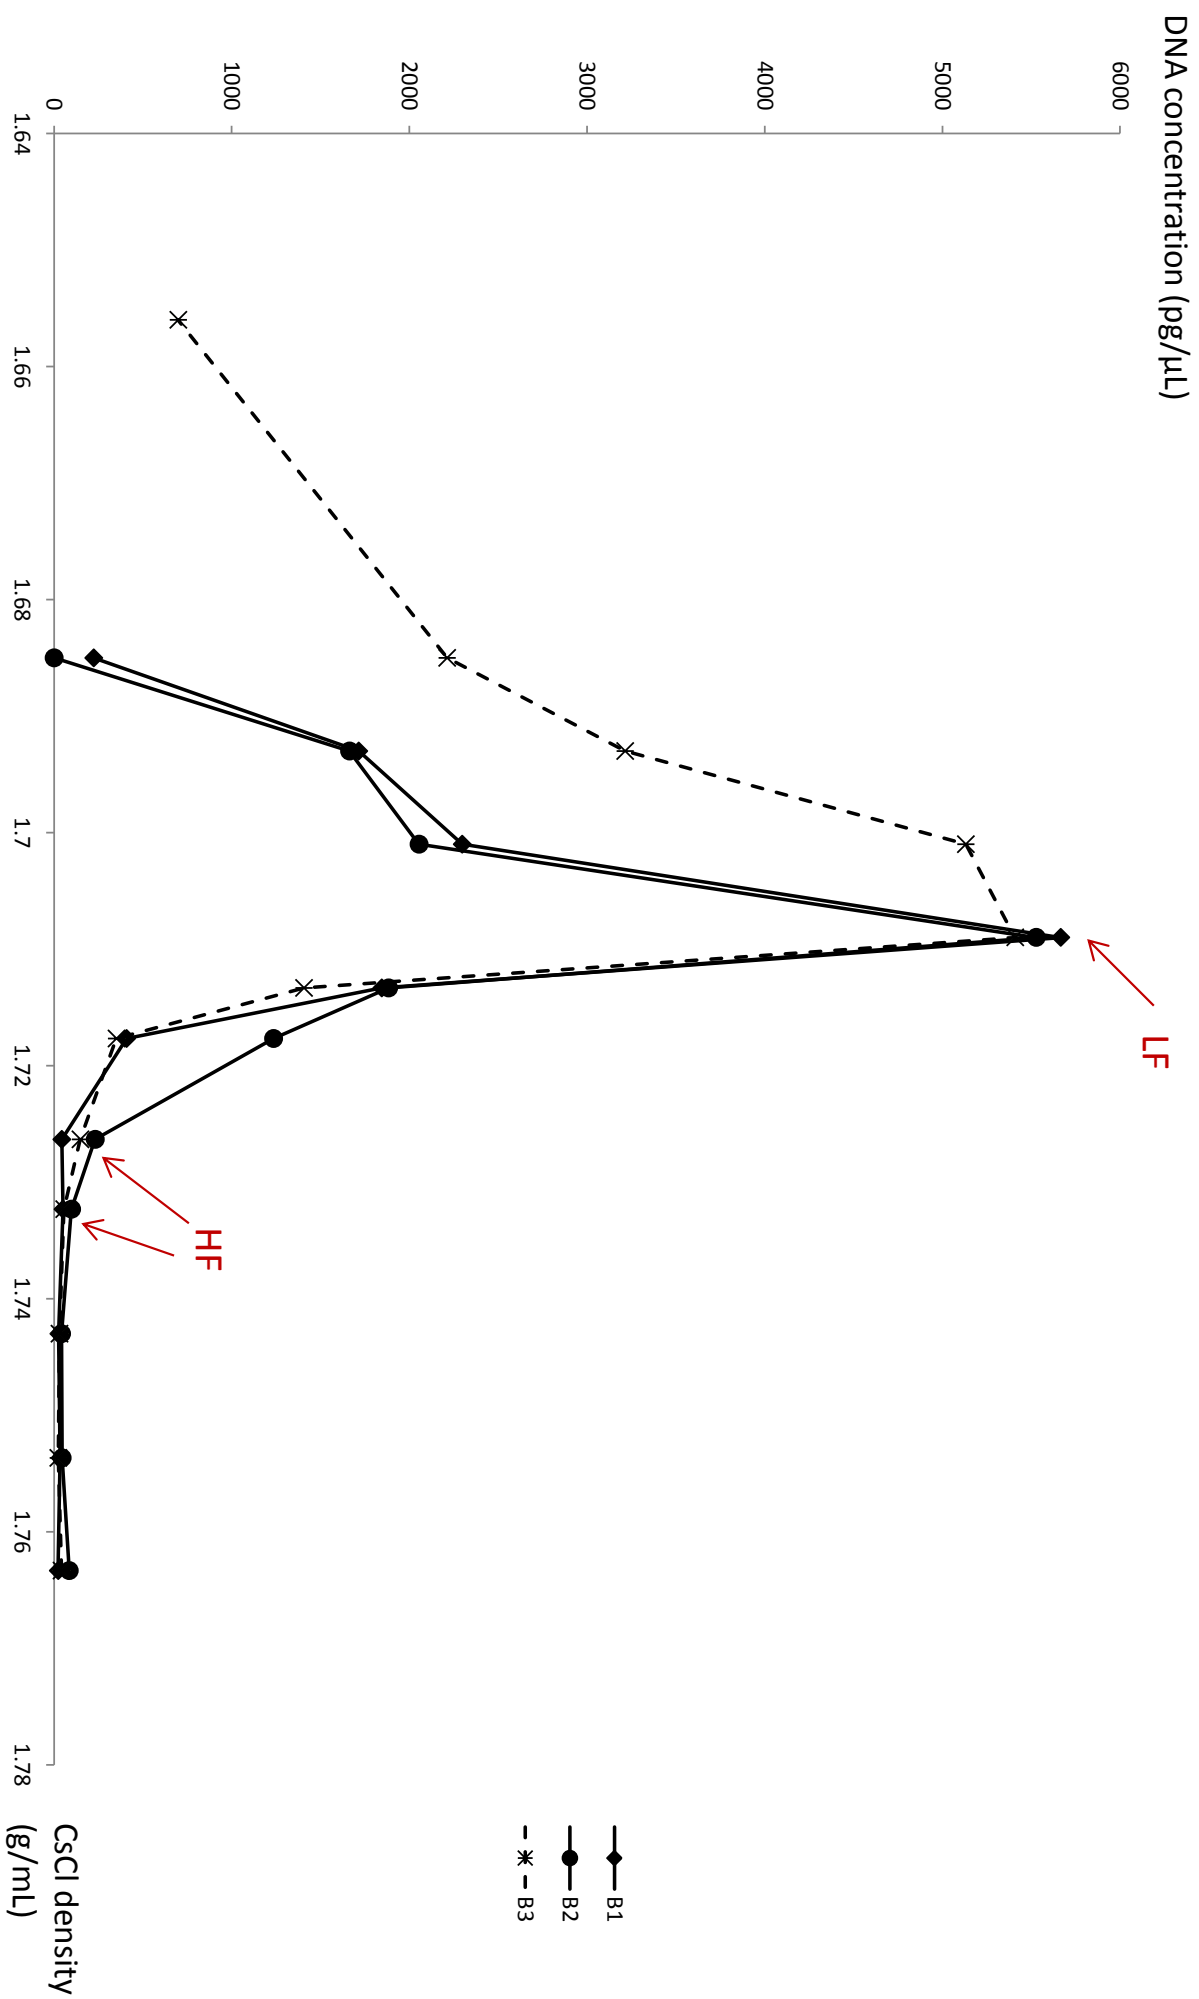

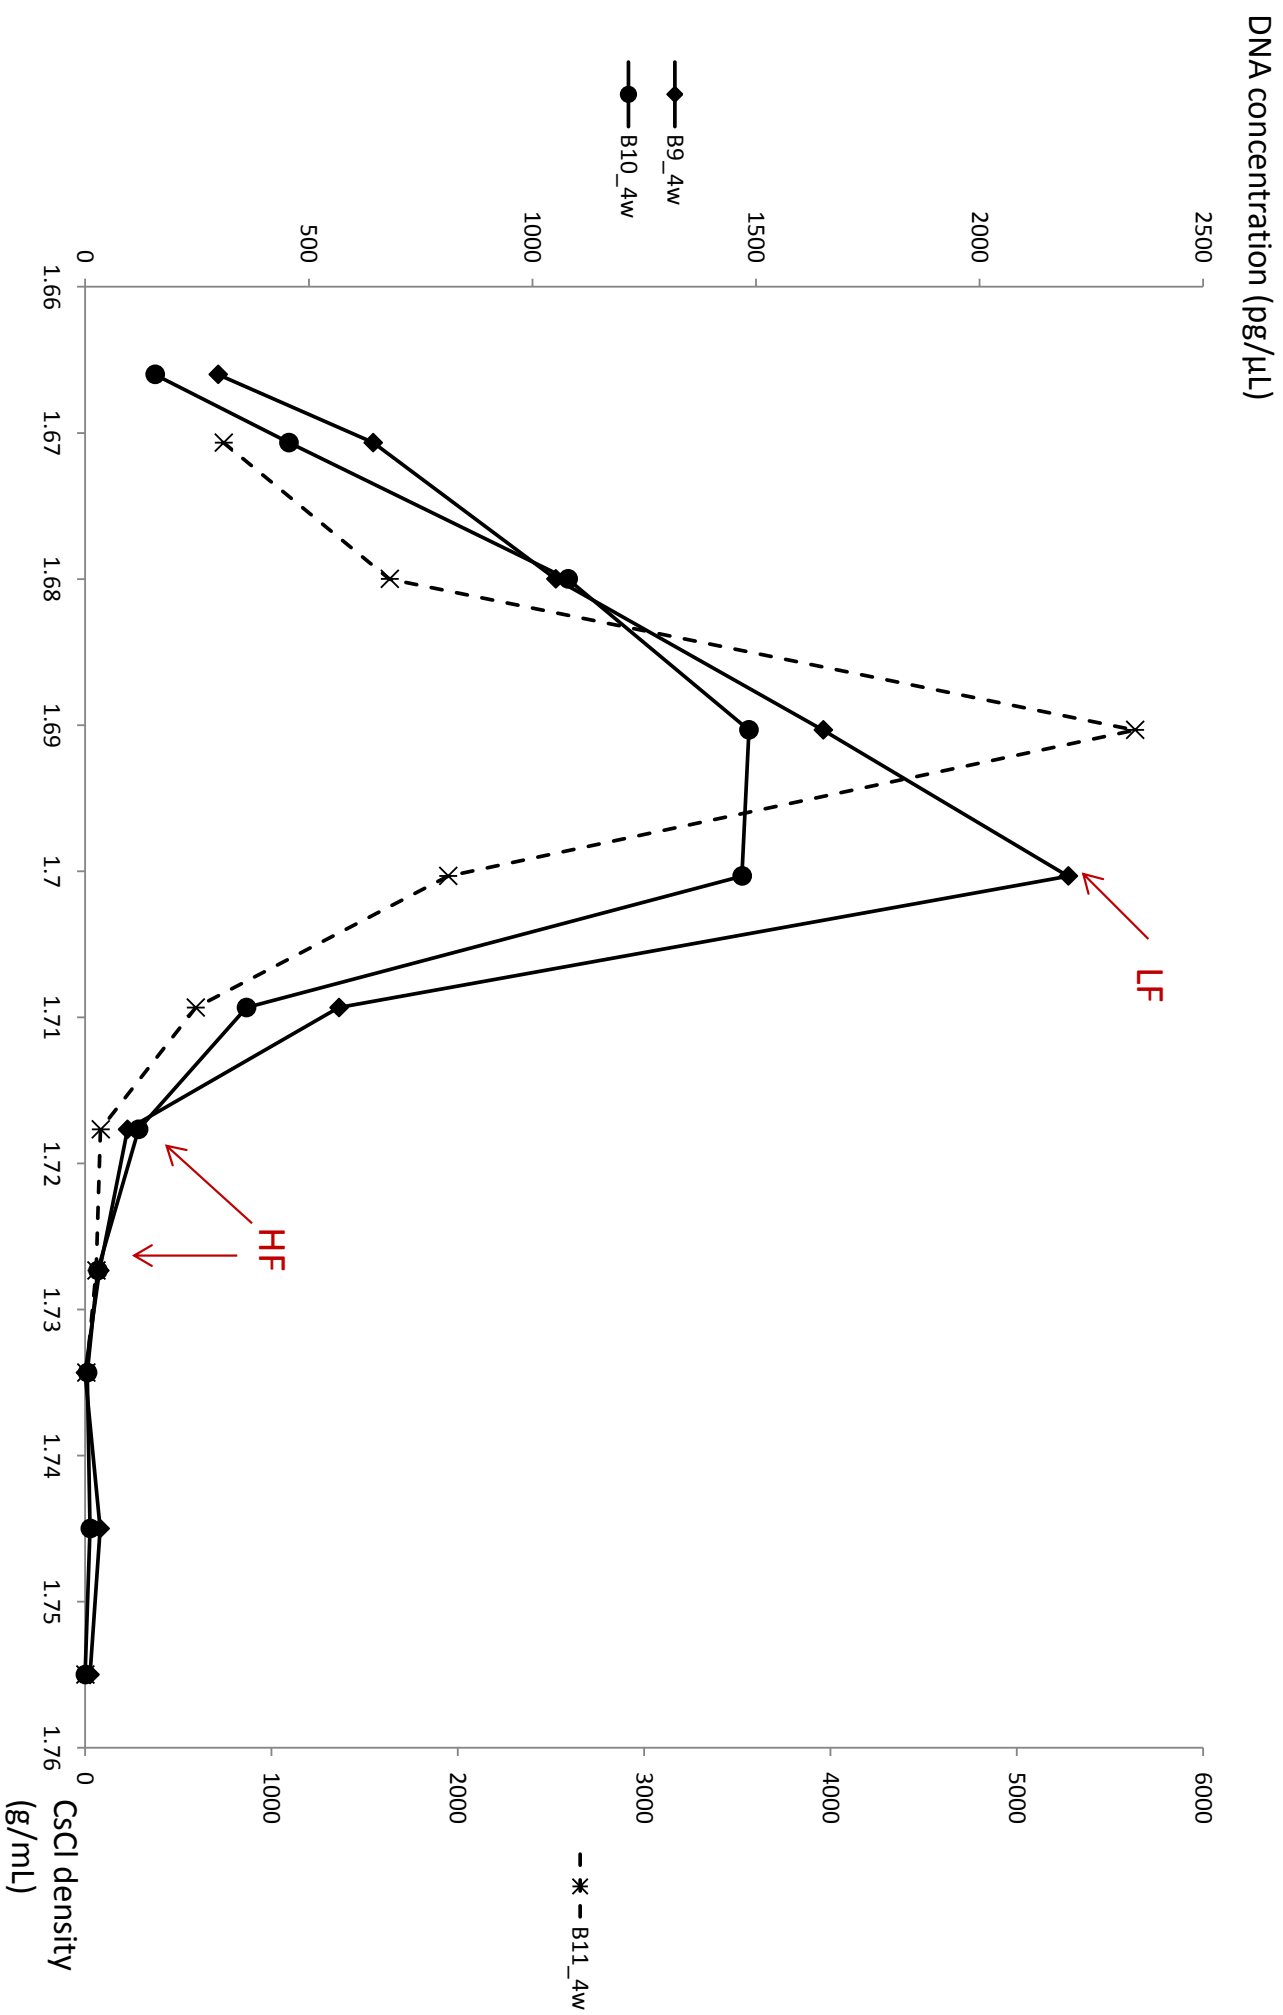

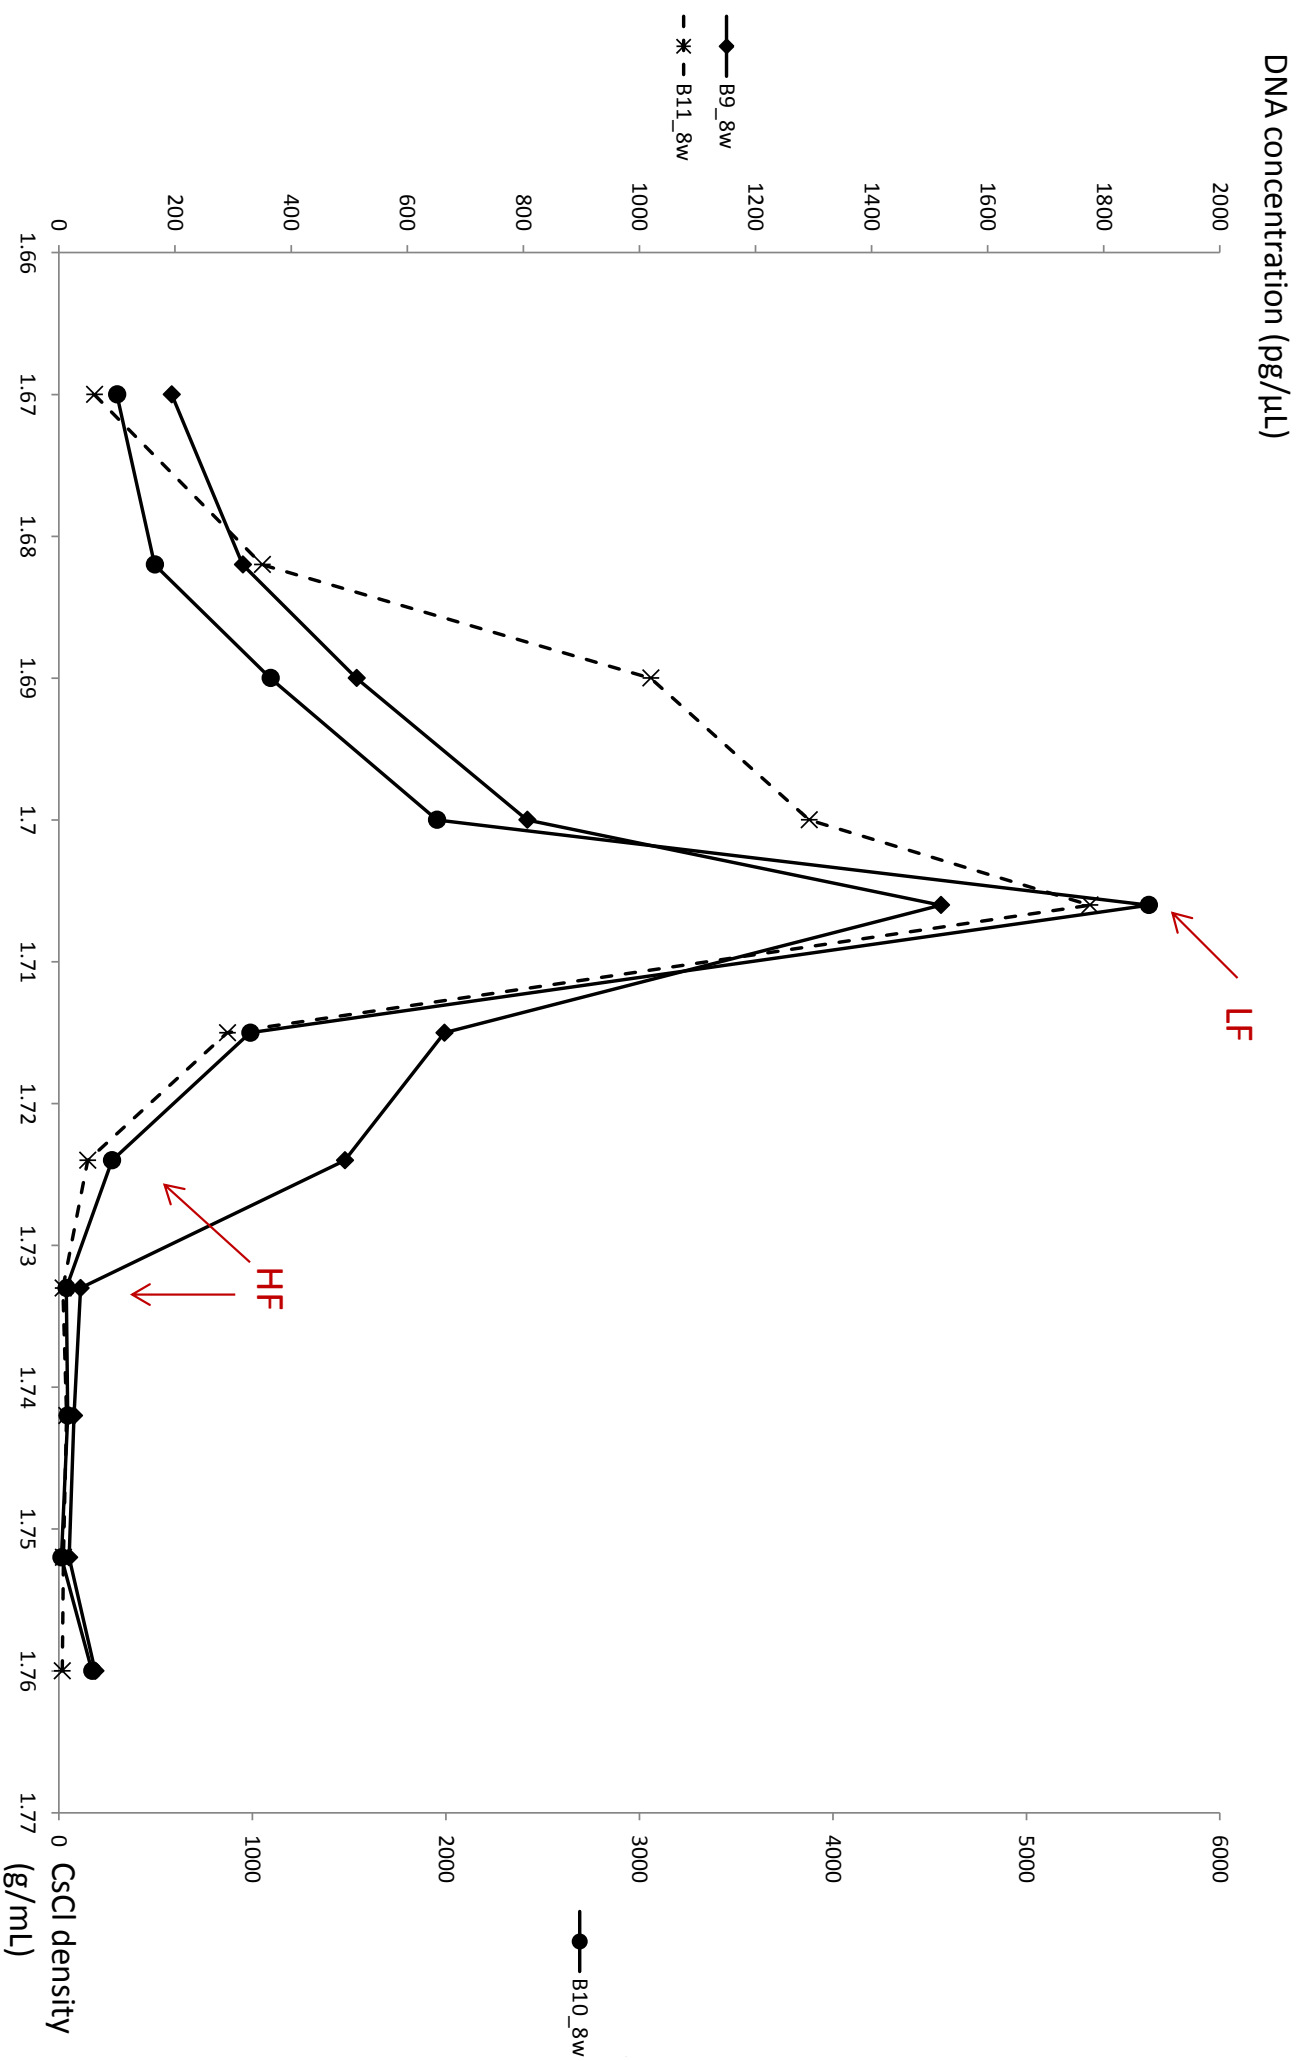

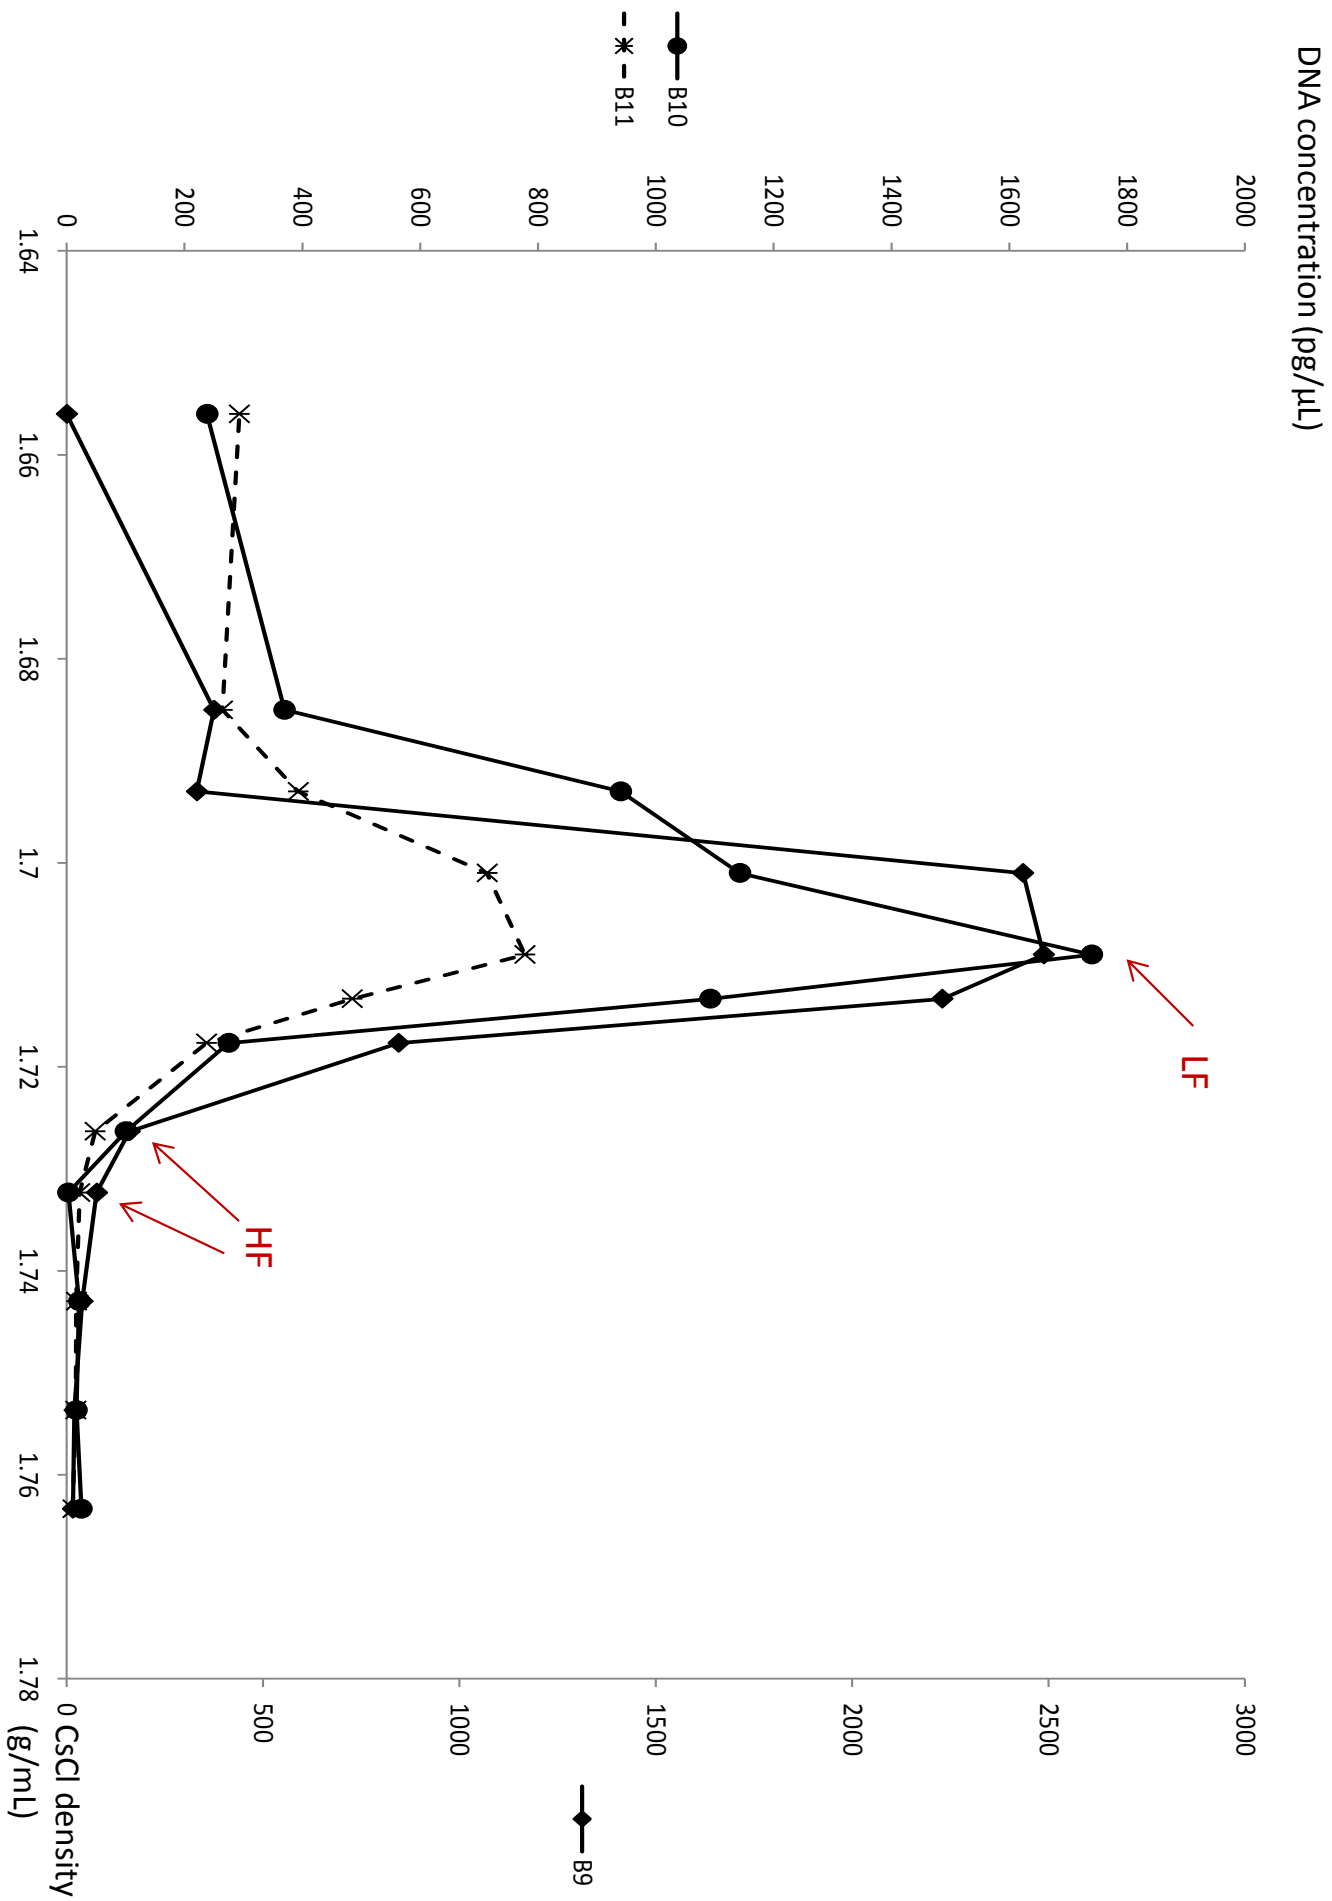

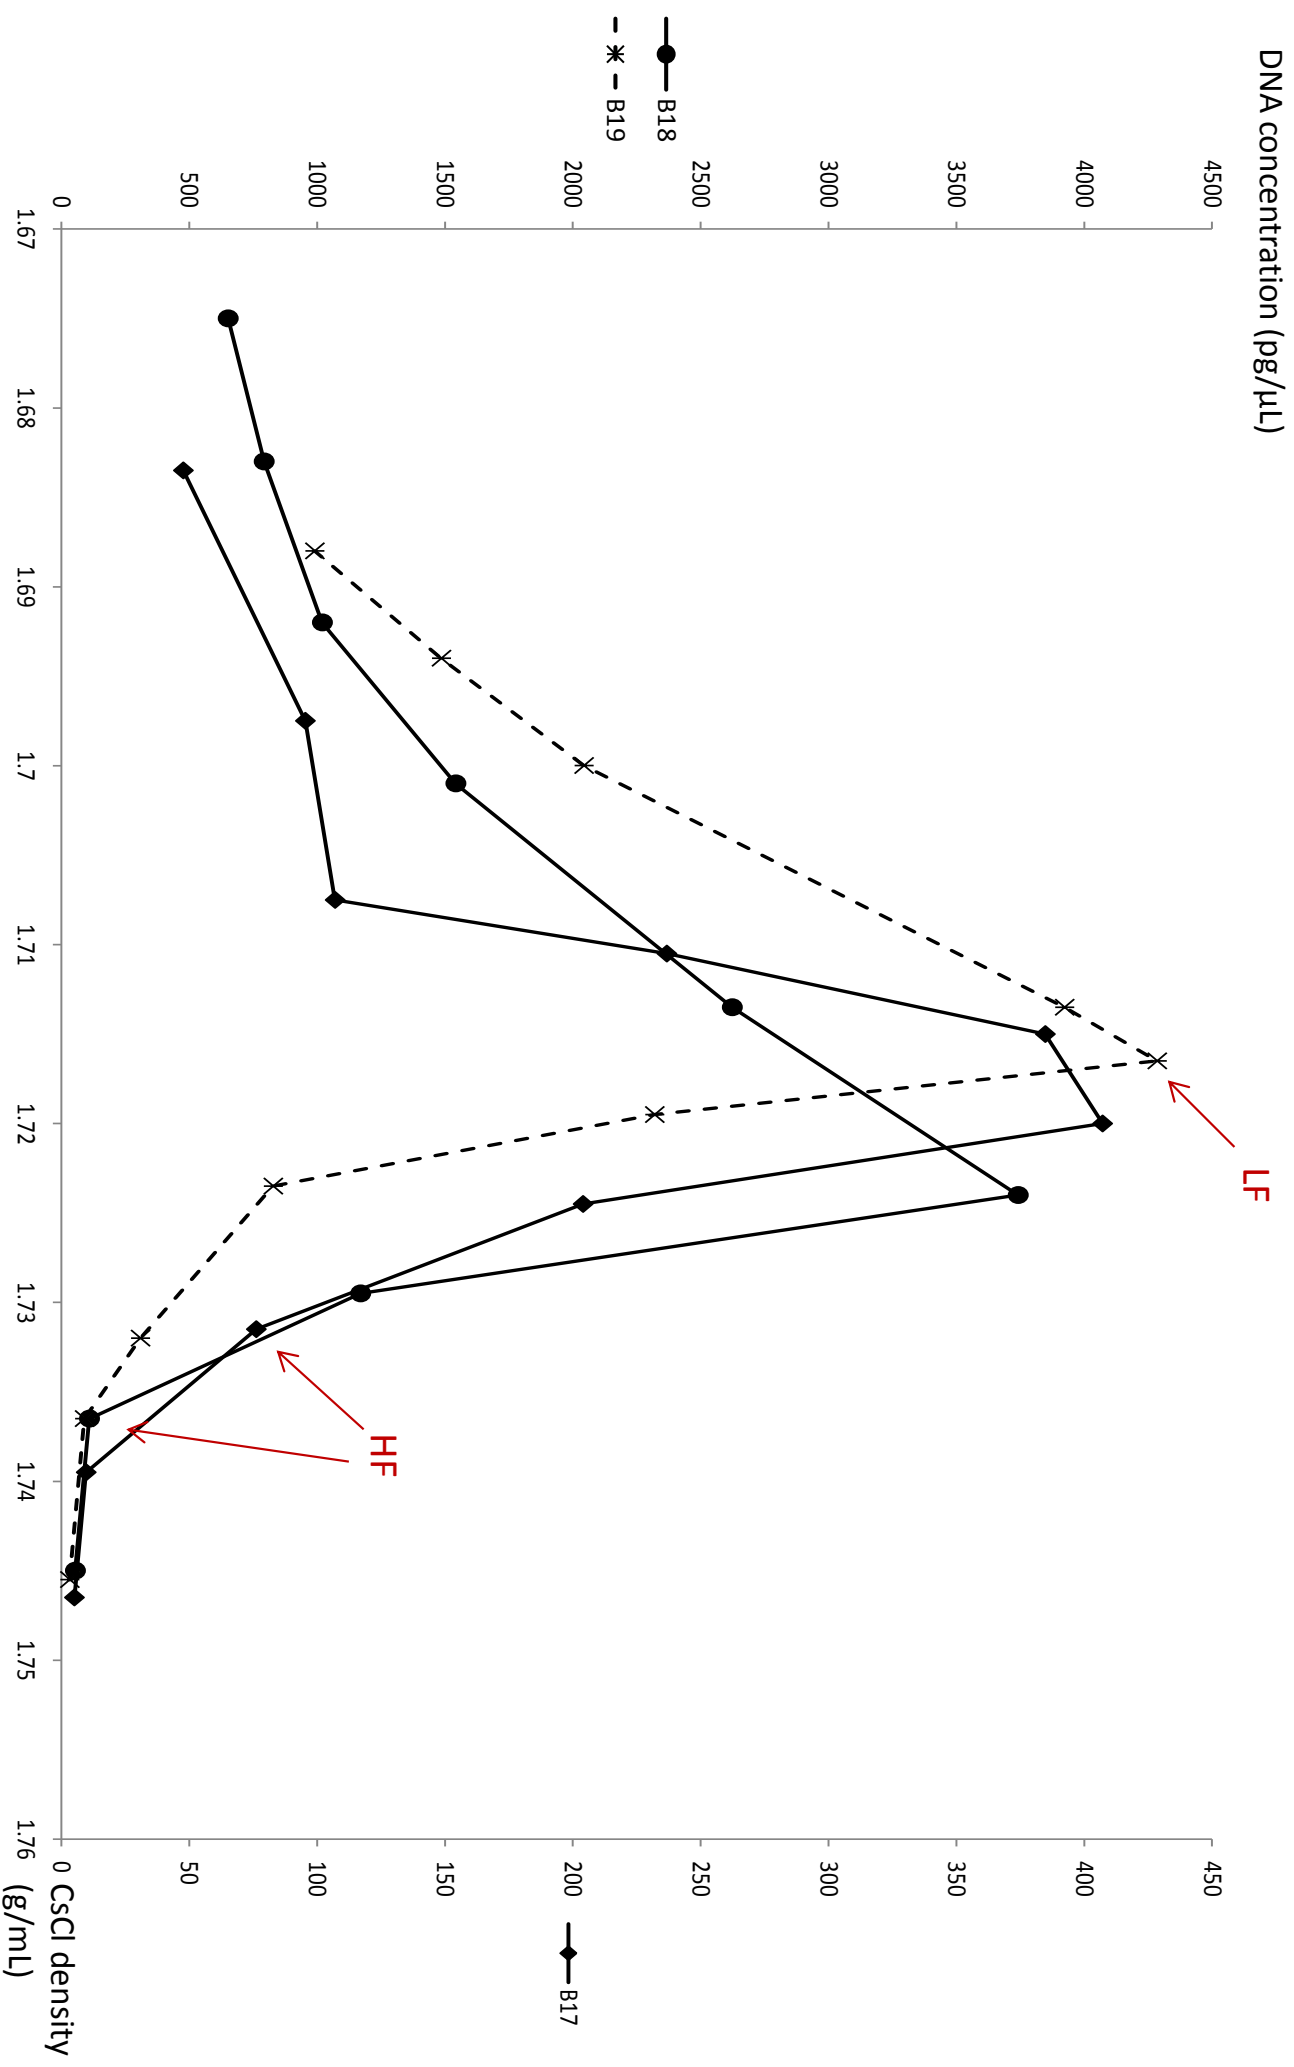

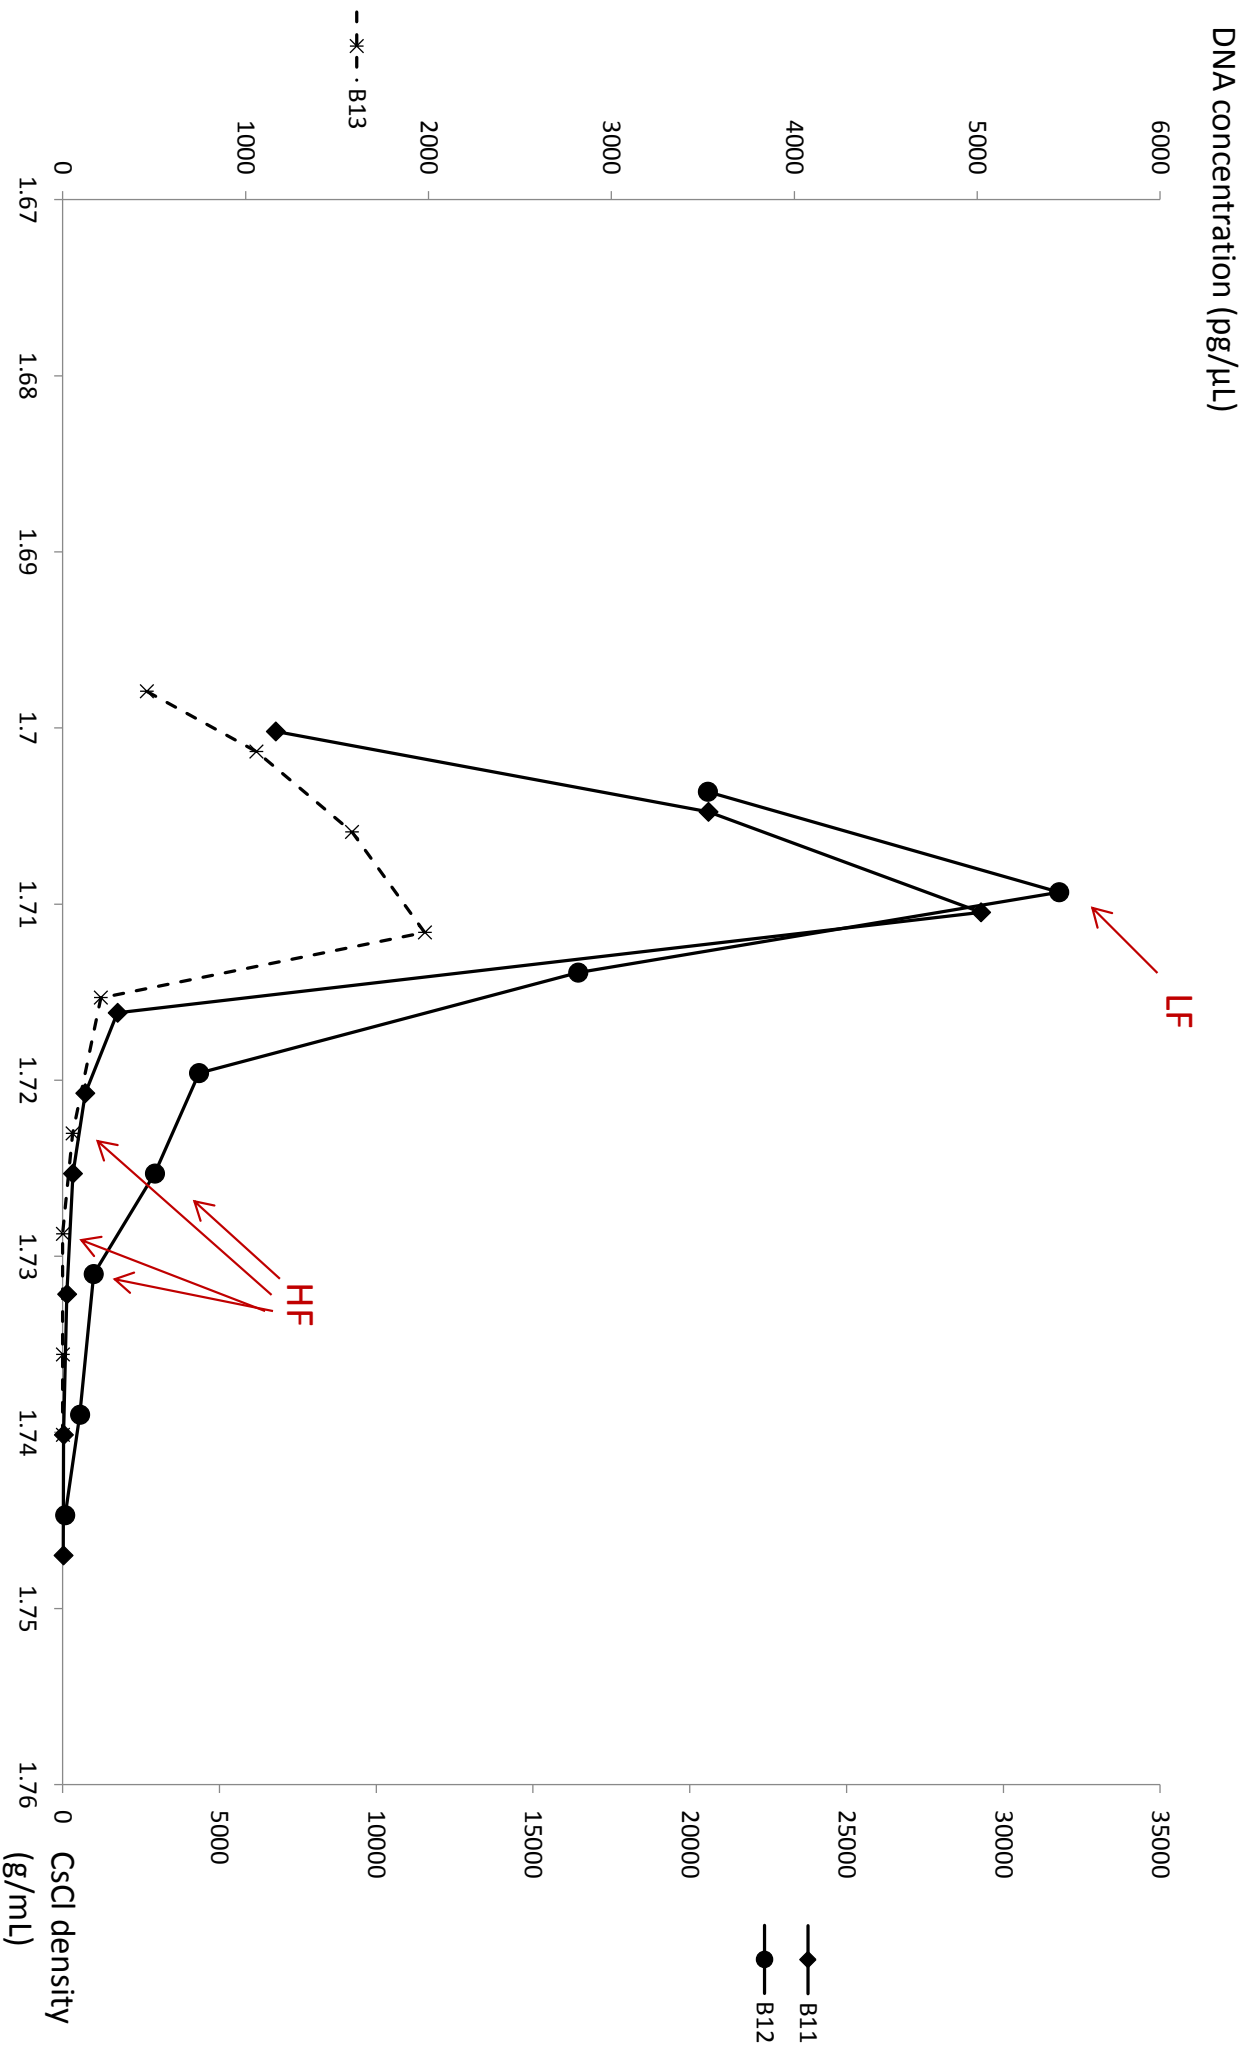



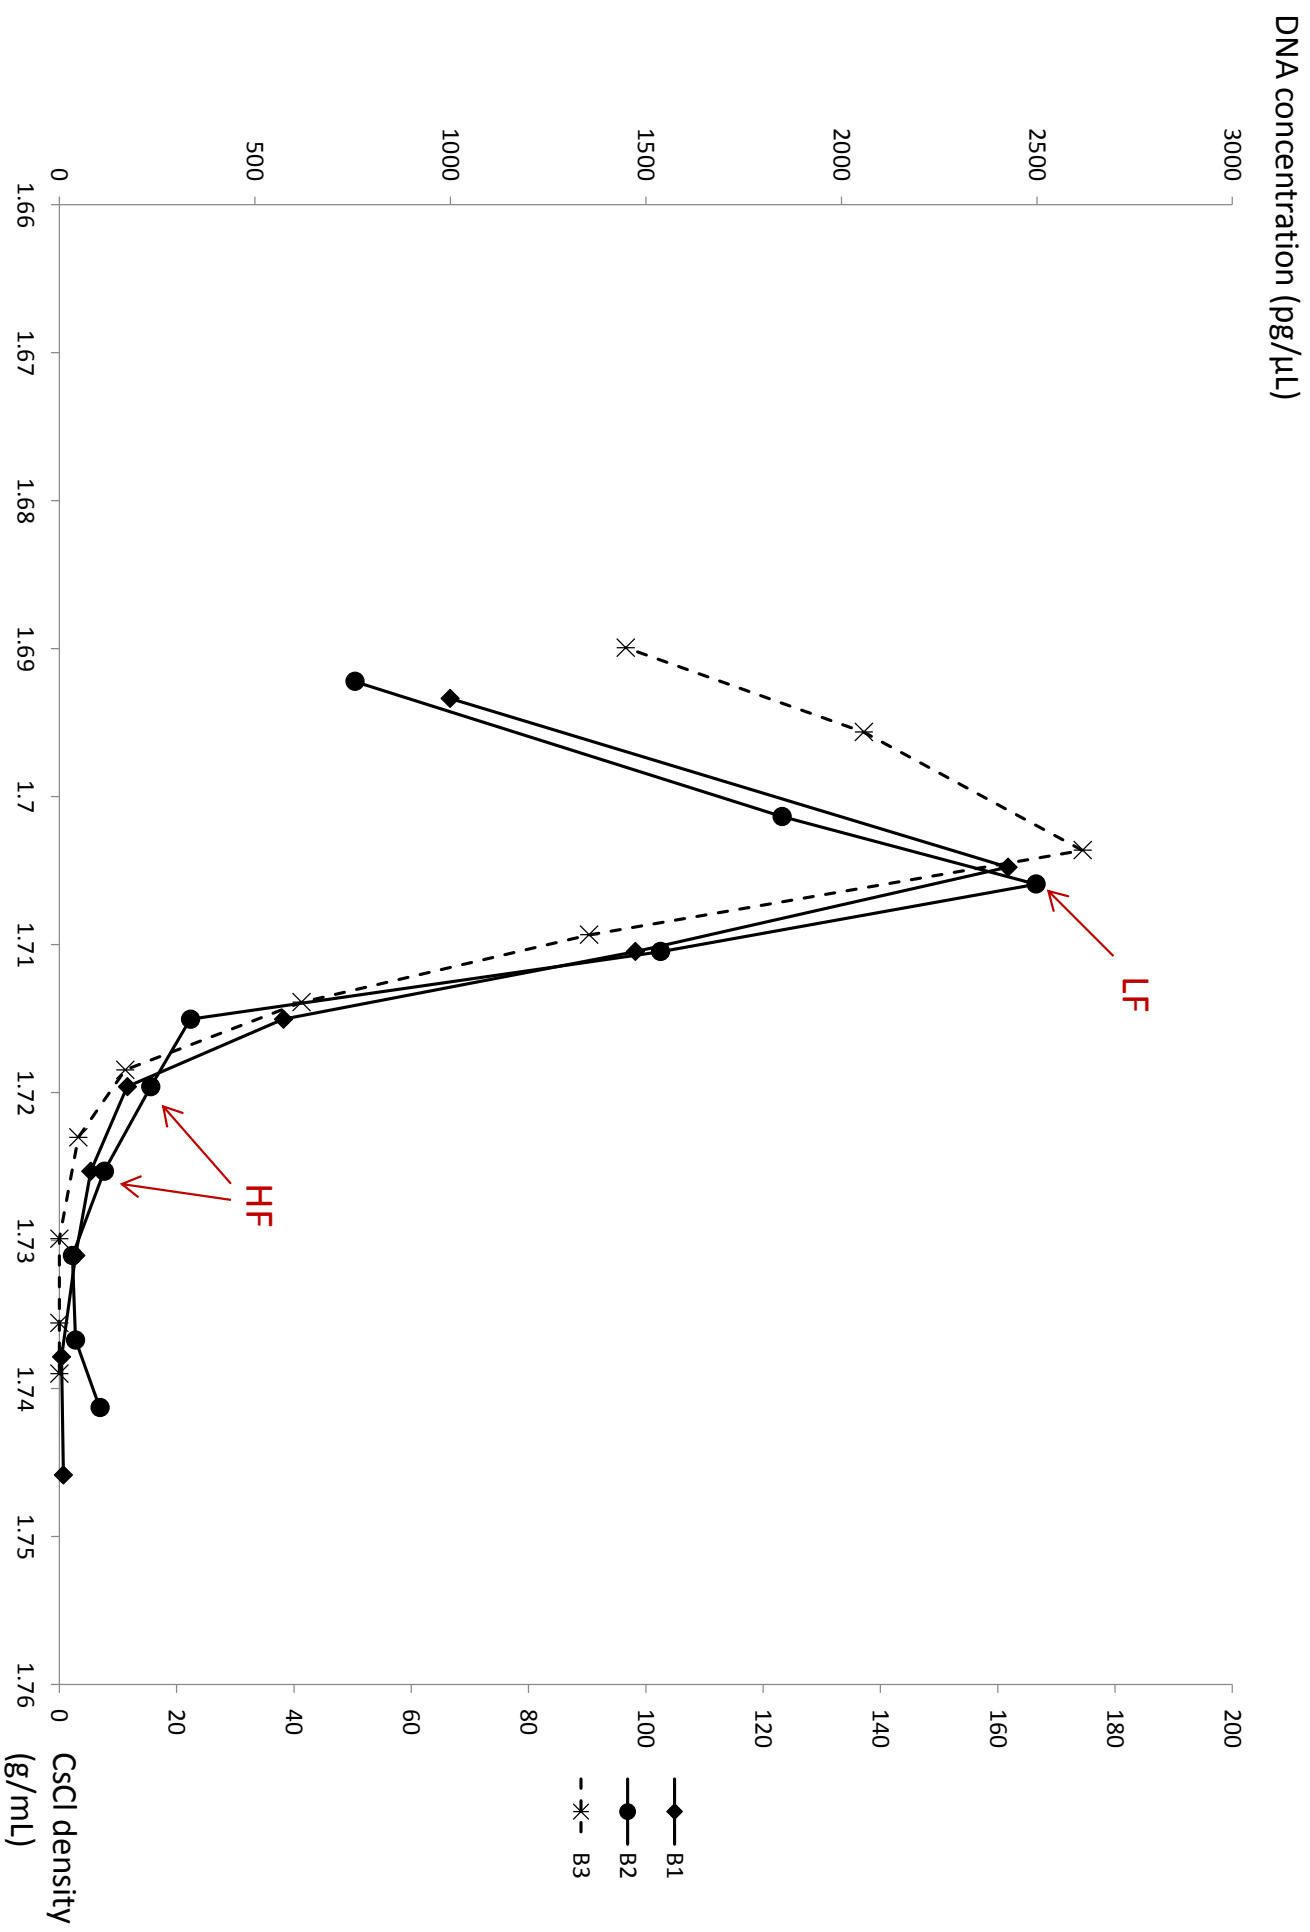

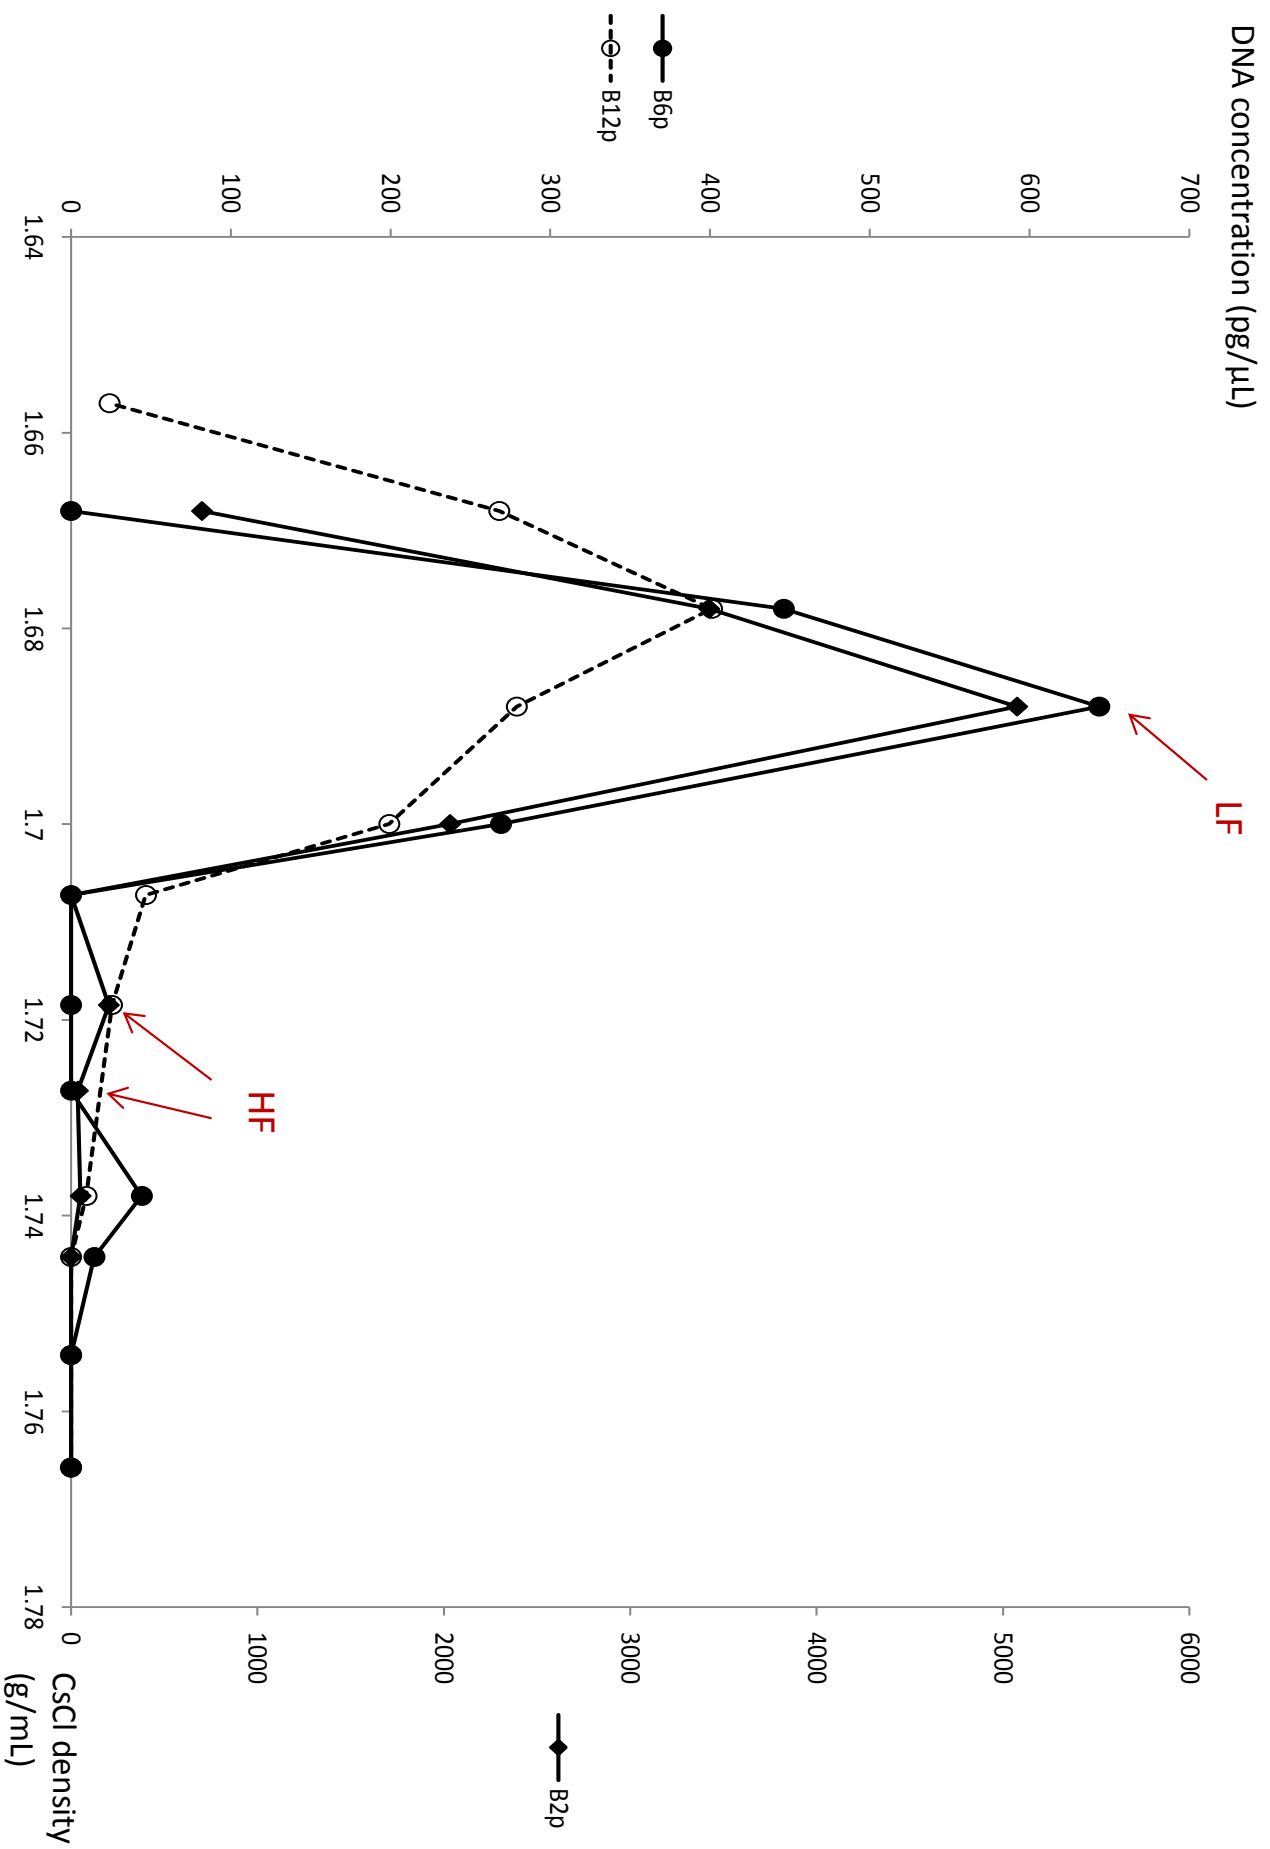

Figure S1.

(A)

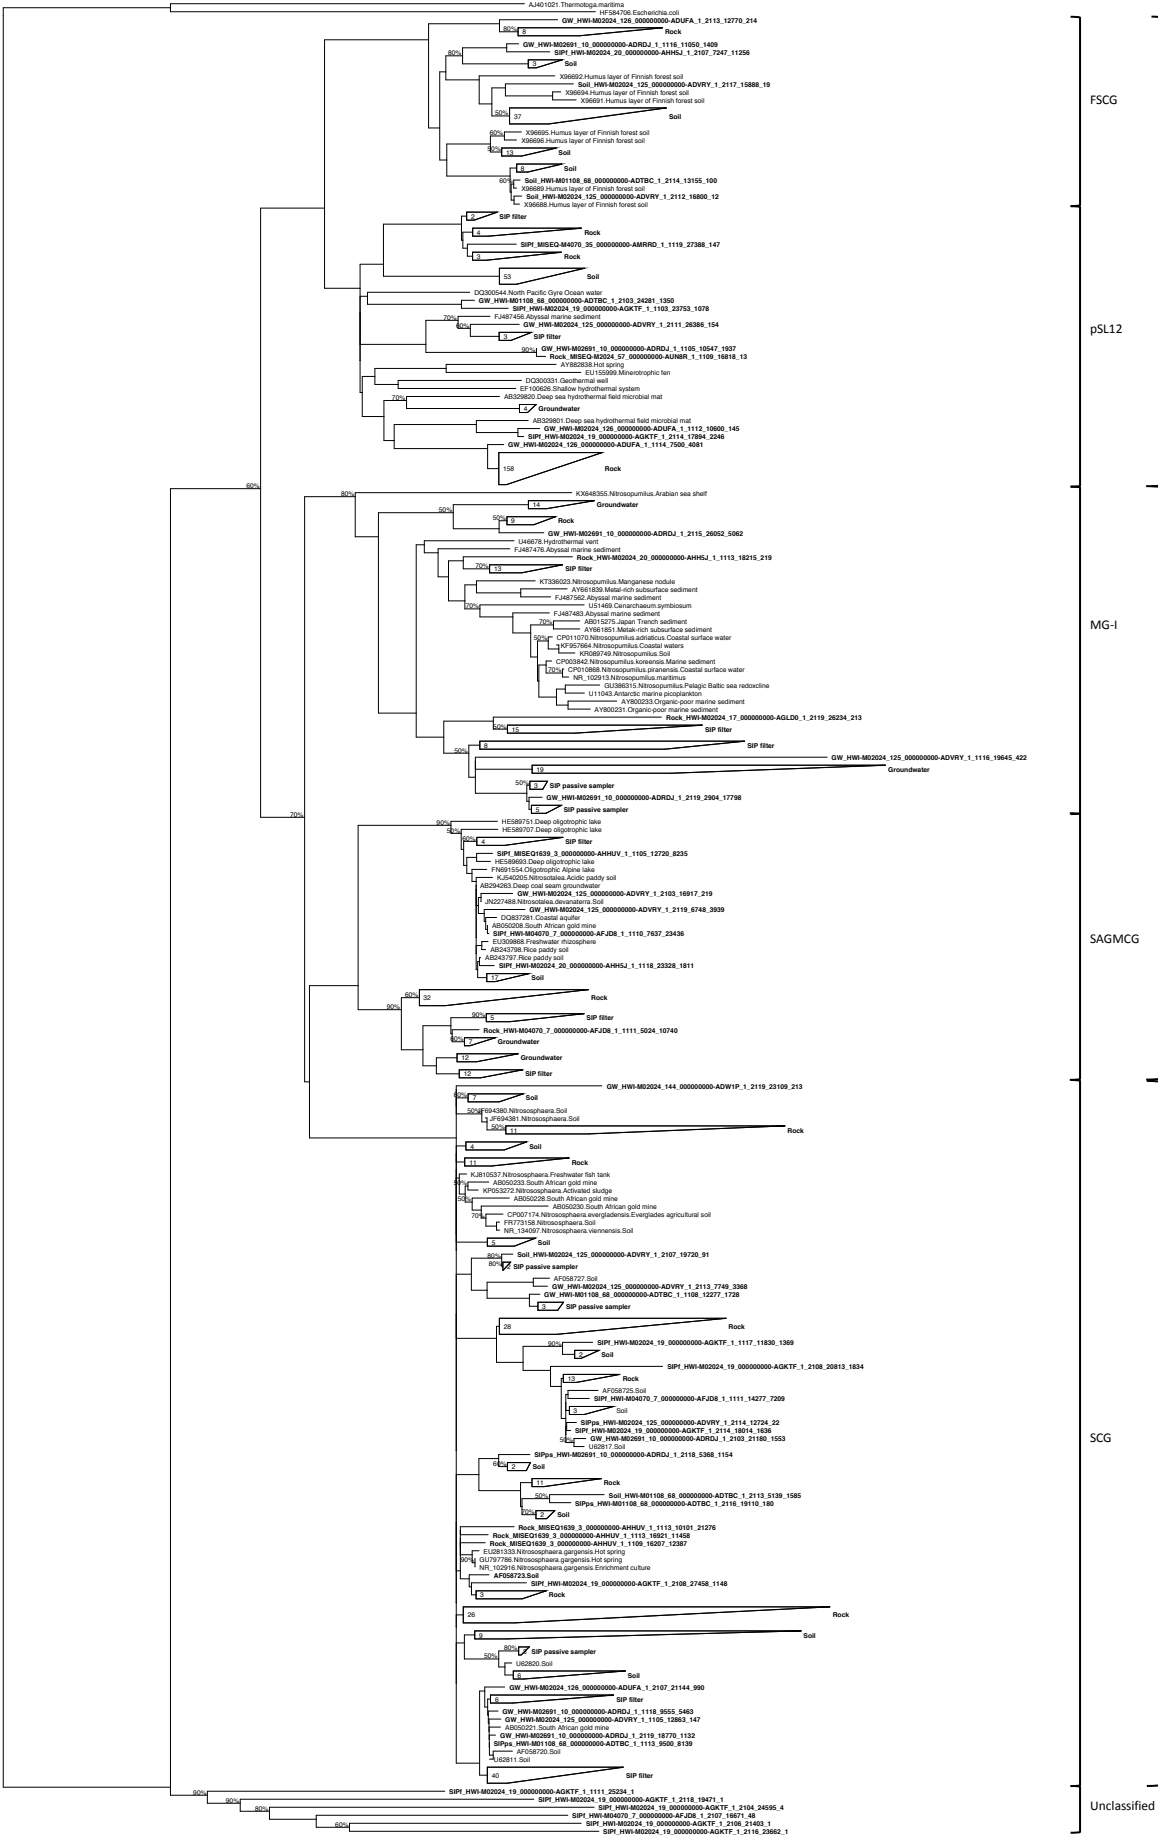

Phylogenetic tree of the 16S rRNA gene sequences of *Methanohalobium* and related genera. The tree is rooted at the top with A3401021 *Thermotoga maritima*. The sequences are labeled with accession numbers and sample identifiers. The tree is color-coded by clade: Methanosarcinales (green), Methanomicrobiales (blue), RC-III (orange), Thermoplasmatales (red), SITS412 (purple), VAL-III (brown), Methanobacteriales (pink), Hadesarchaea (grey), and VAL-II (yellow).

Key clades and sequences shown include:

- Methanosarcinales:** *Methanosarcina* species (e.g., NR\_074232, NR\_028042, SIP1\_HWI-M02024\_19\_000000000-AGKTF\_1\_1118\_19642\_7352).
- Methanomicrobiales:** *Methanohalobium* species (e.g., SIP1\_HWI-M02024\_17\_000000000-AGLDO\_1\_2118\_19993\_2018, SIP1\_HWI-M02024\_19\_000000000-AGKTF\_1\_1102\_22854\_1851).
- RC-III:** *Methanohalobium* species (e.g., SIP1\_HWI-M02024\_19\_000000000-AGKTF\_1\_2117\_15802\_1862, SIP1\_HWI-M02024\_17\_000000000-AGLDO\_1\_2103\_14705\_1921).
- Thermoplasmatales:** *Thermoplasma* species (e.g., AF050618, FJ484274).
- SITS412:** *Methanohalobium* species (e.g., SIP1\_HWI-M02024\_19\_000000000-AGKTF\_1\_2119\_12699\_2127, HMI187523.SIT3412.Hanford formation saturated zone).
- VAL-III:** *Methanohalobium* species (e.g., SIP1\_HWI-M02024\_19\_000000000-AGKTF\_1\_2117\_26677\_1397, SIP1\_HWI-M02024\_19\_000000000-AGKTF\_1\_2117\_26677\_1397).
- Methanobacteriales:** *Methanobacterium* species (e.g., SIP1\_HWI-M02024\_19\_000000000-AGKTF\_1\_2117\_26677\_1397, SIP1\_HWI-M02024\_19\_000000000-AGKTF\_1\_2117\_26677\_1397).
- Hadesarchaea:** *Methanohalobium* species (e.g., SIP1\_HWI-M02024\_19\_000000000-AGKTF\_1\_2117\_26677\_1397, SIP1\_HWI-M02024\_19\_000000000-AGKTF\_1\_2117\_26677\_1397).
- VAL-II:** *Methanohalobium* species (e.g., SIP1\_HWI-M02024\_19\_000000000-AGKTF\_1\_2117\_26677\_1397, SIP1\_HWI-M02024\_19\_000000000-AGKTF\_1\_2117\_26677\_1397).

(C)

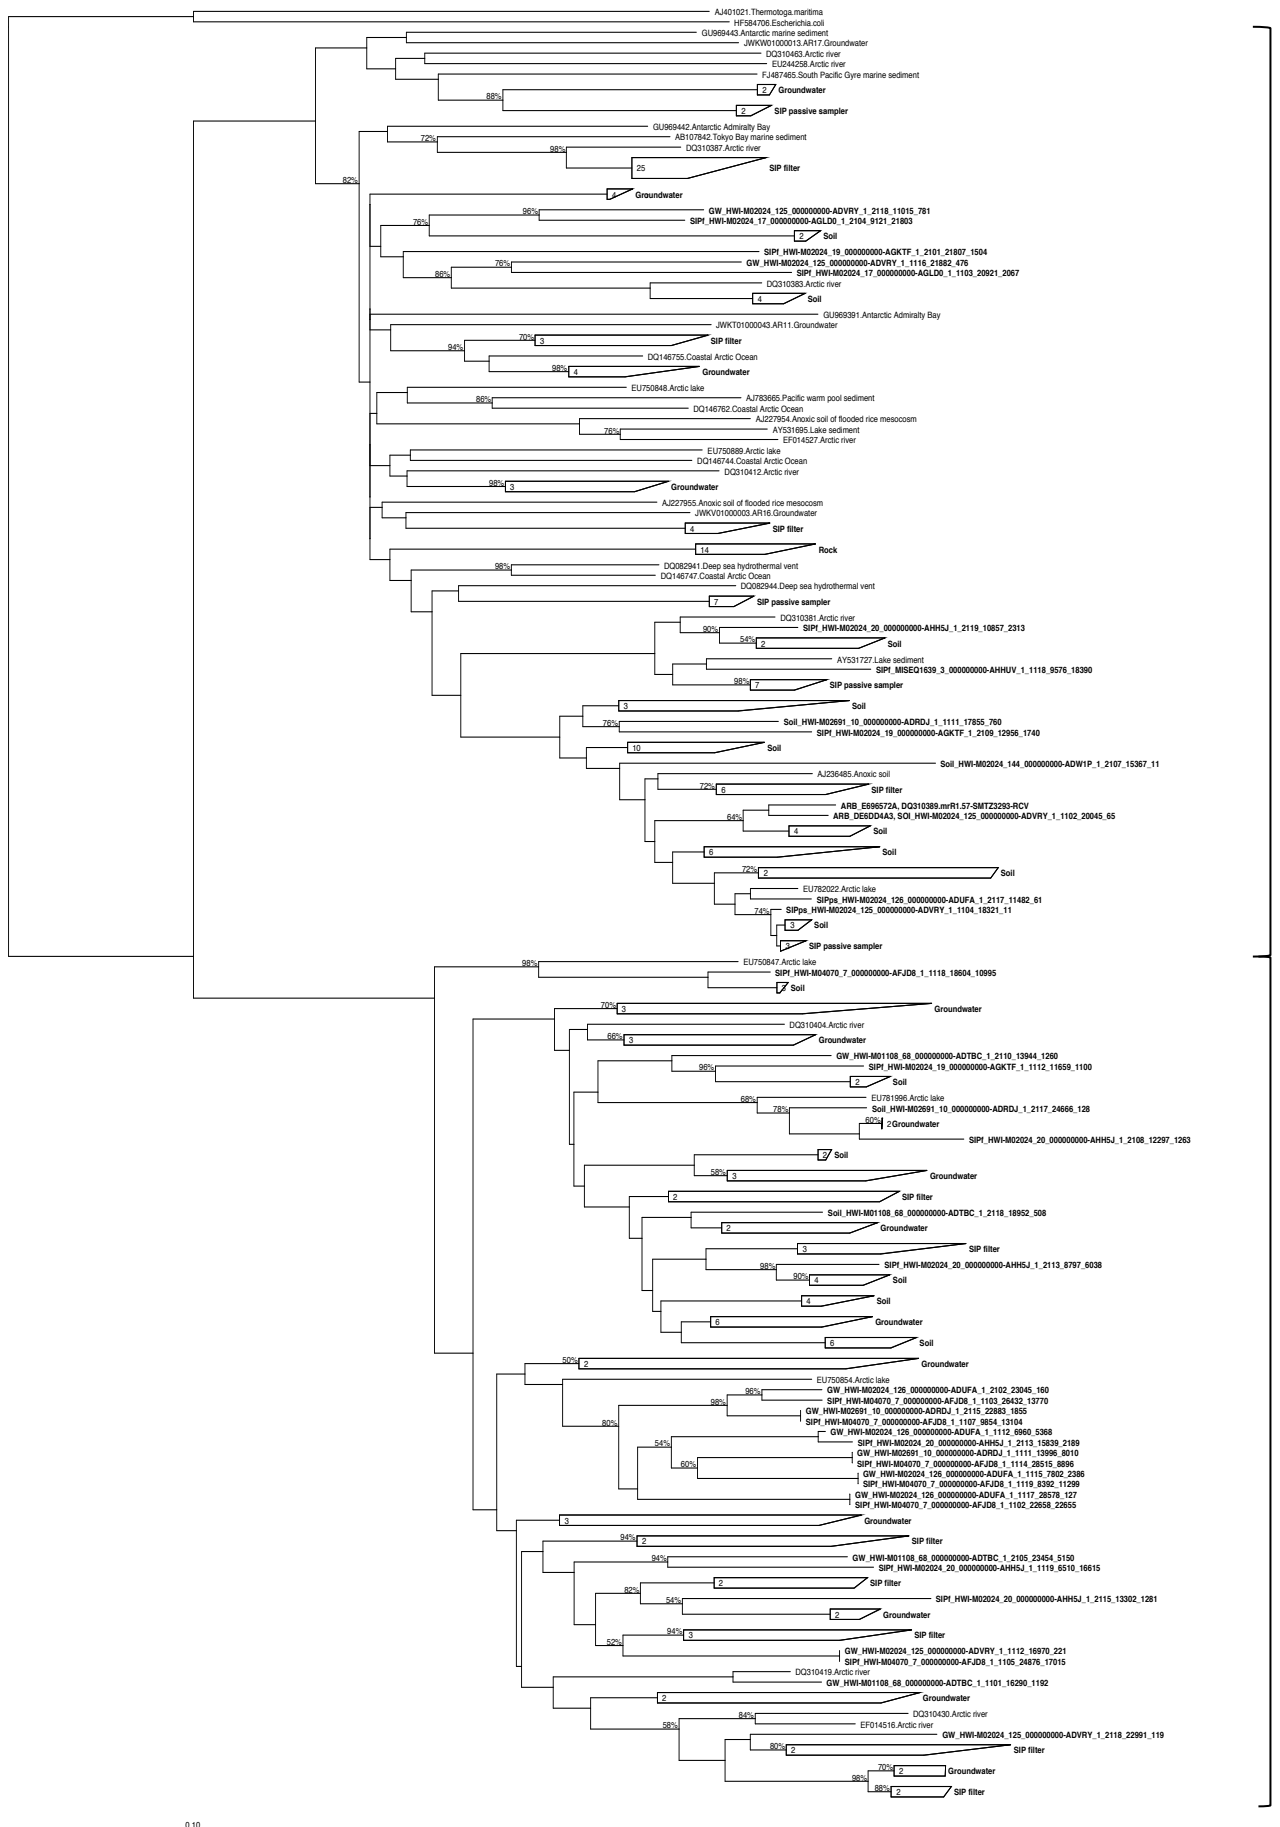

RC-V

DHVE-6

(D)

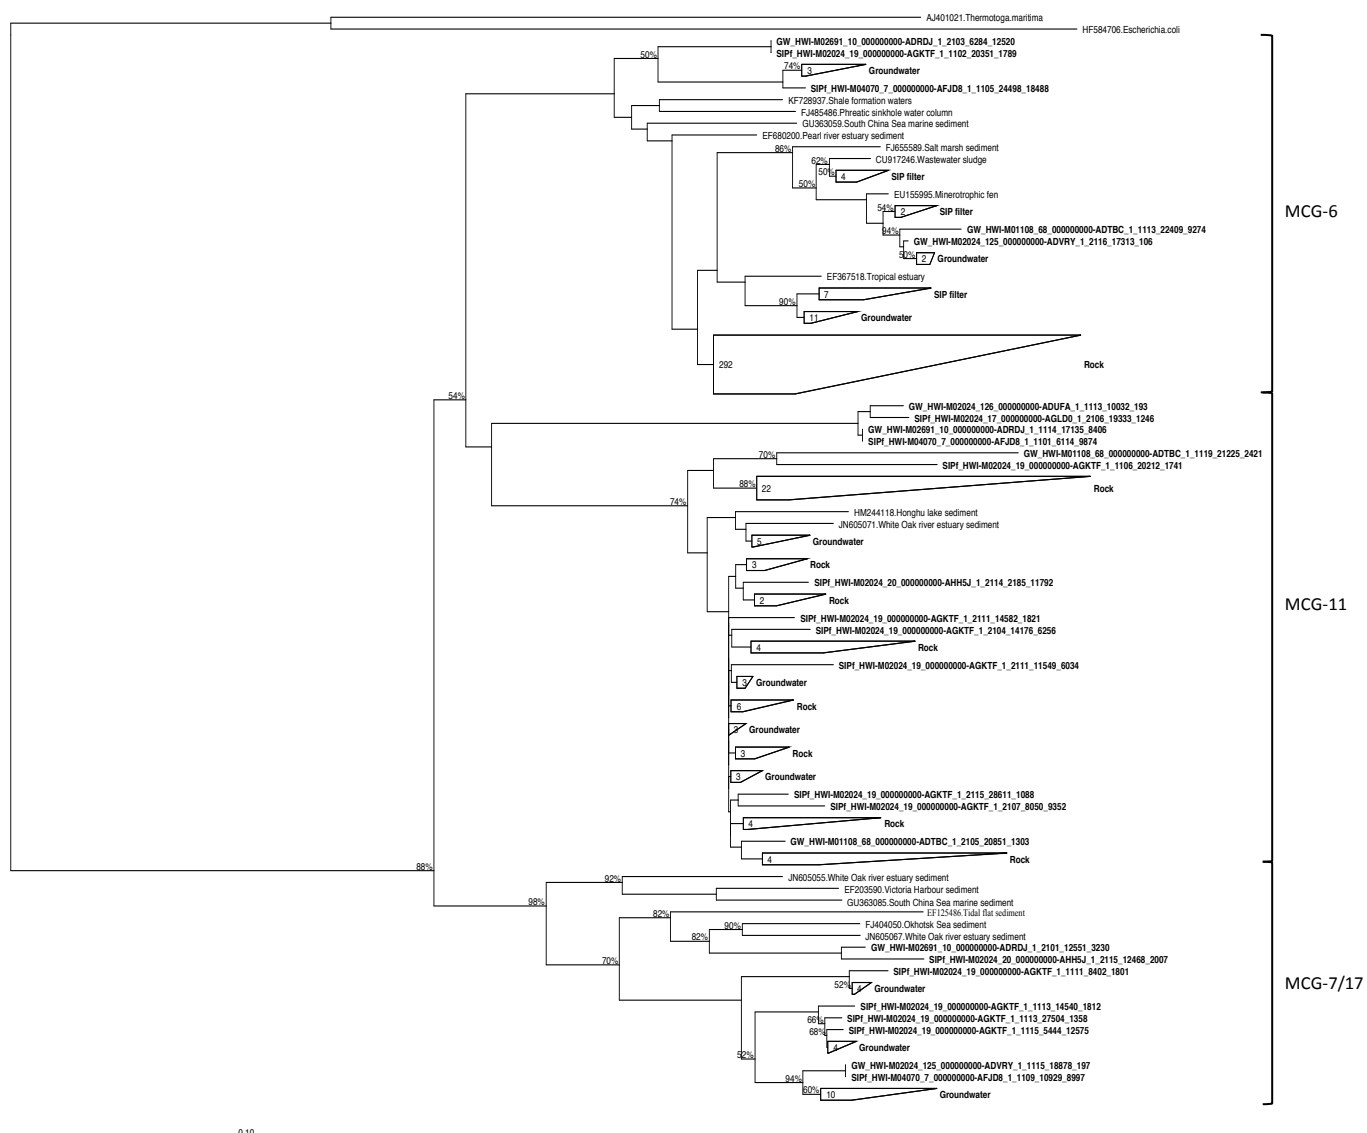

Figure S2.

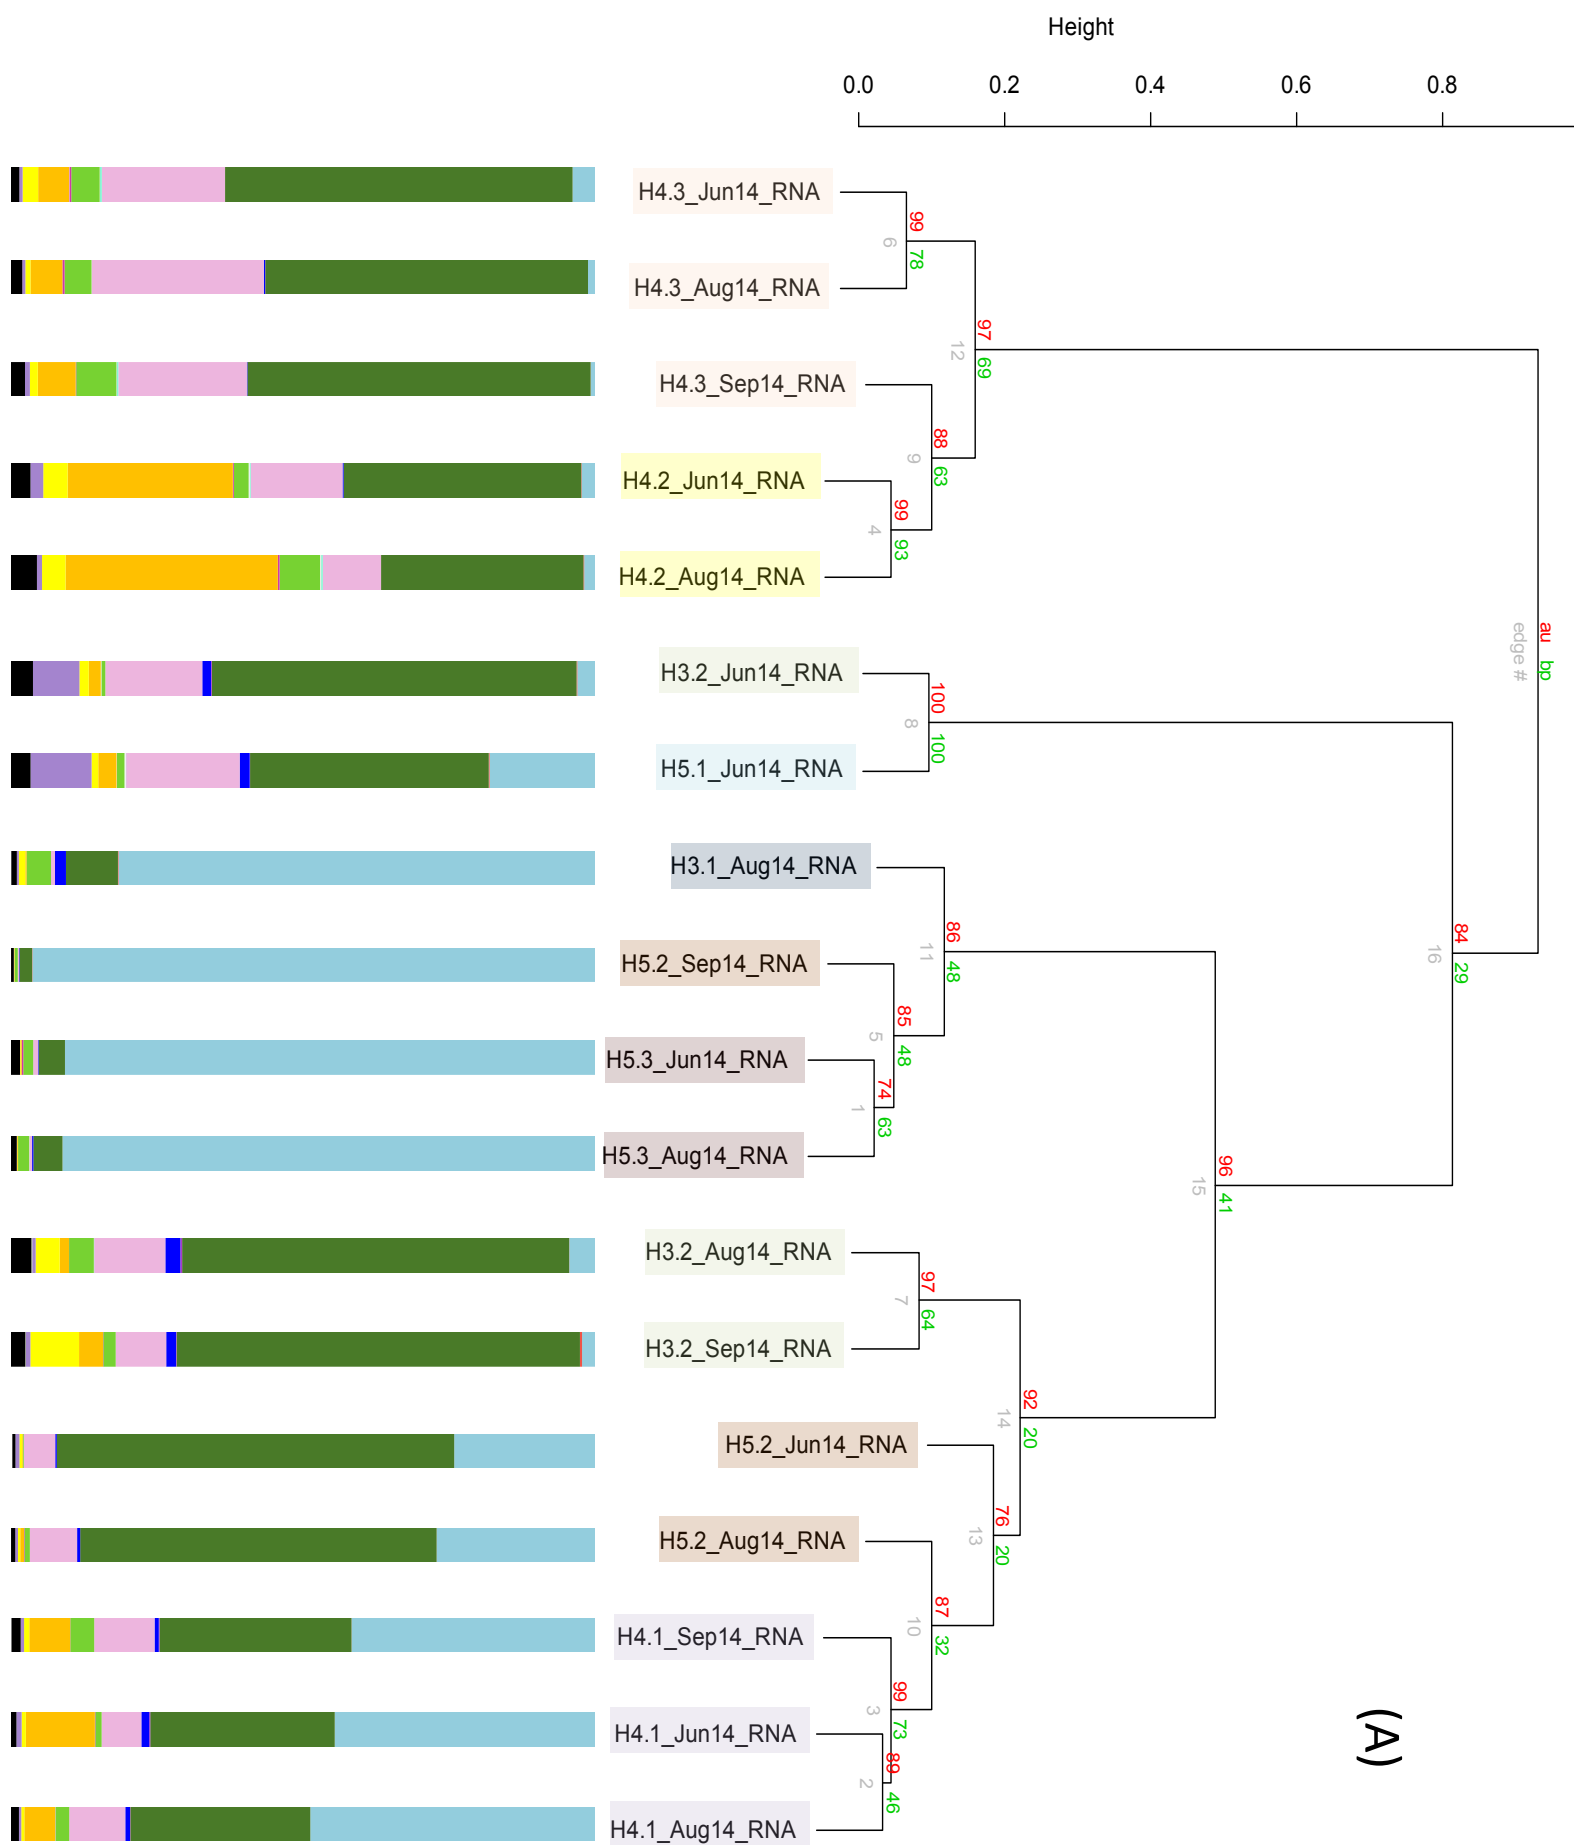

(B)

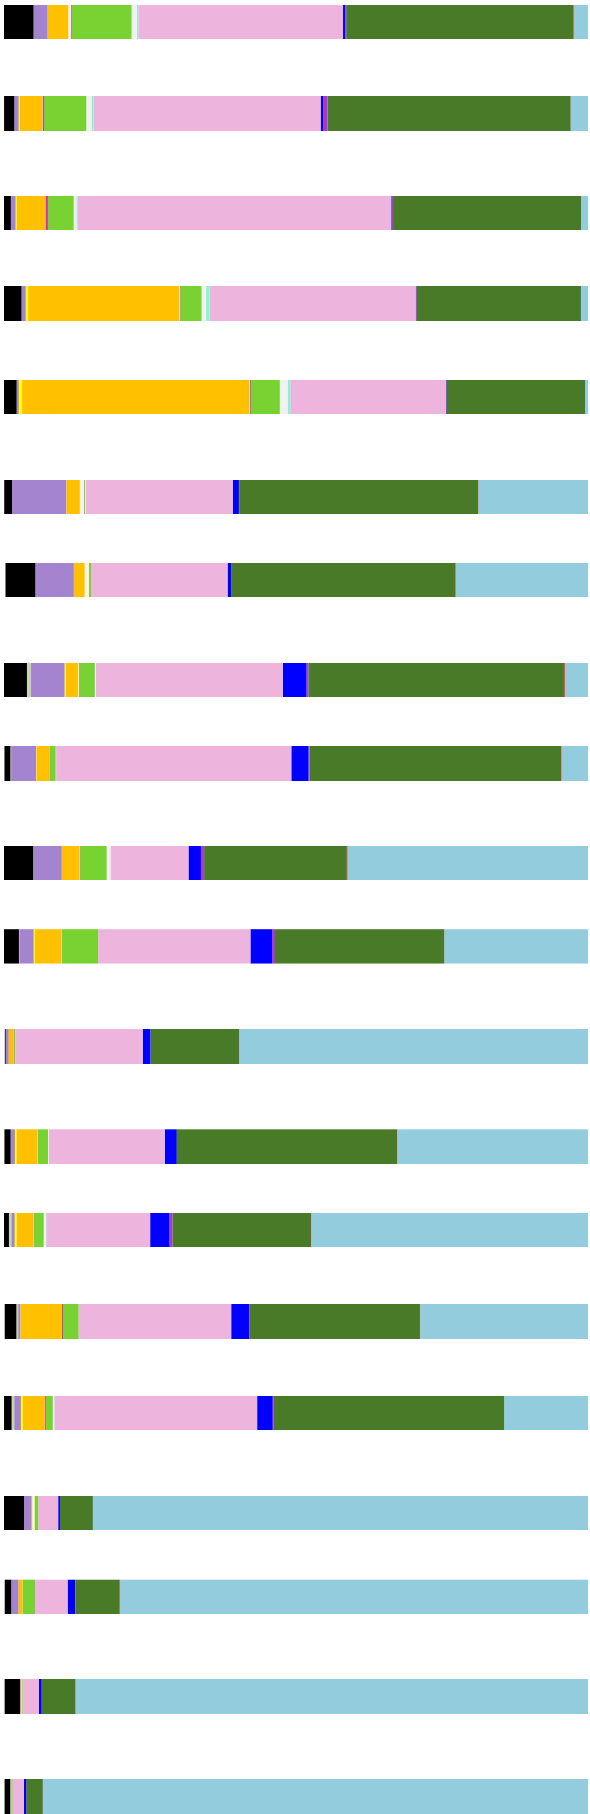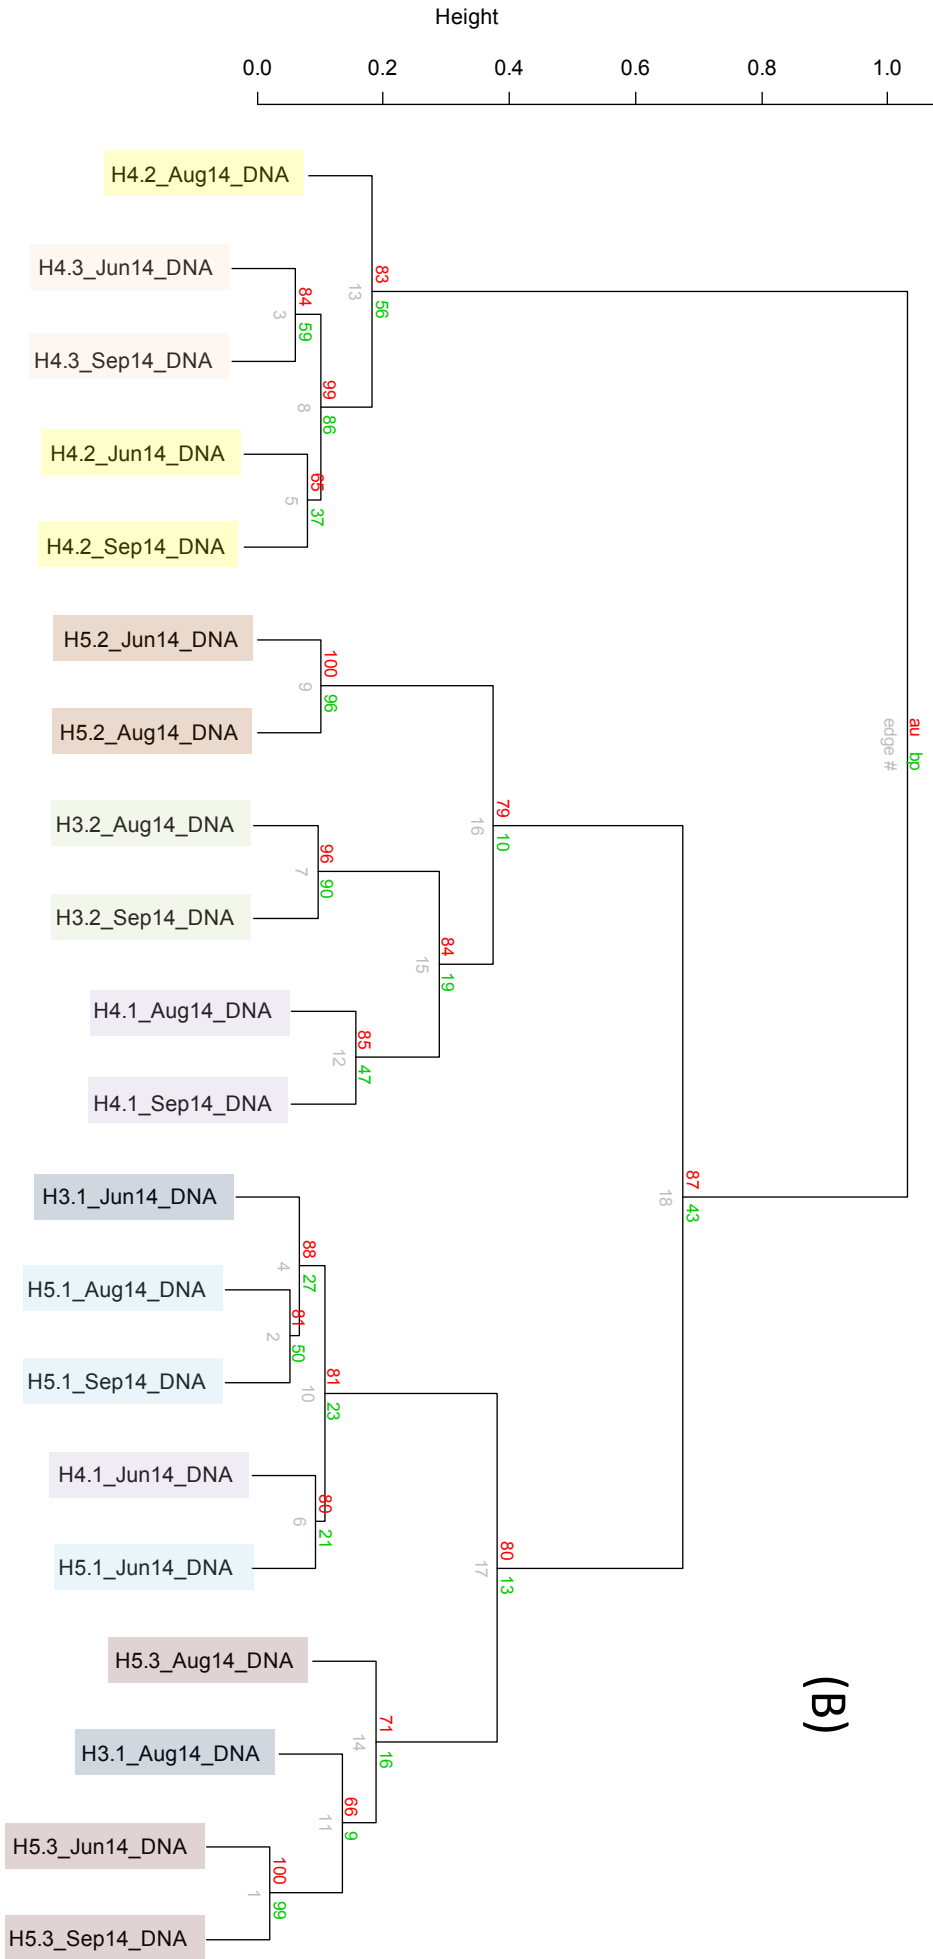

Figure S3.



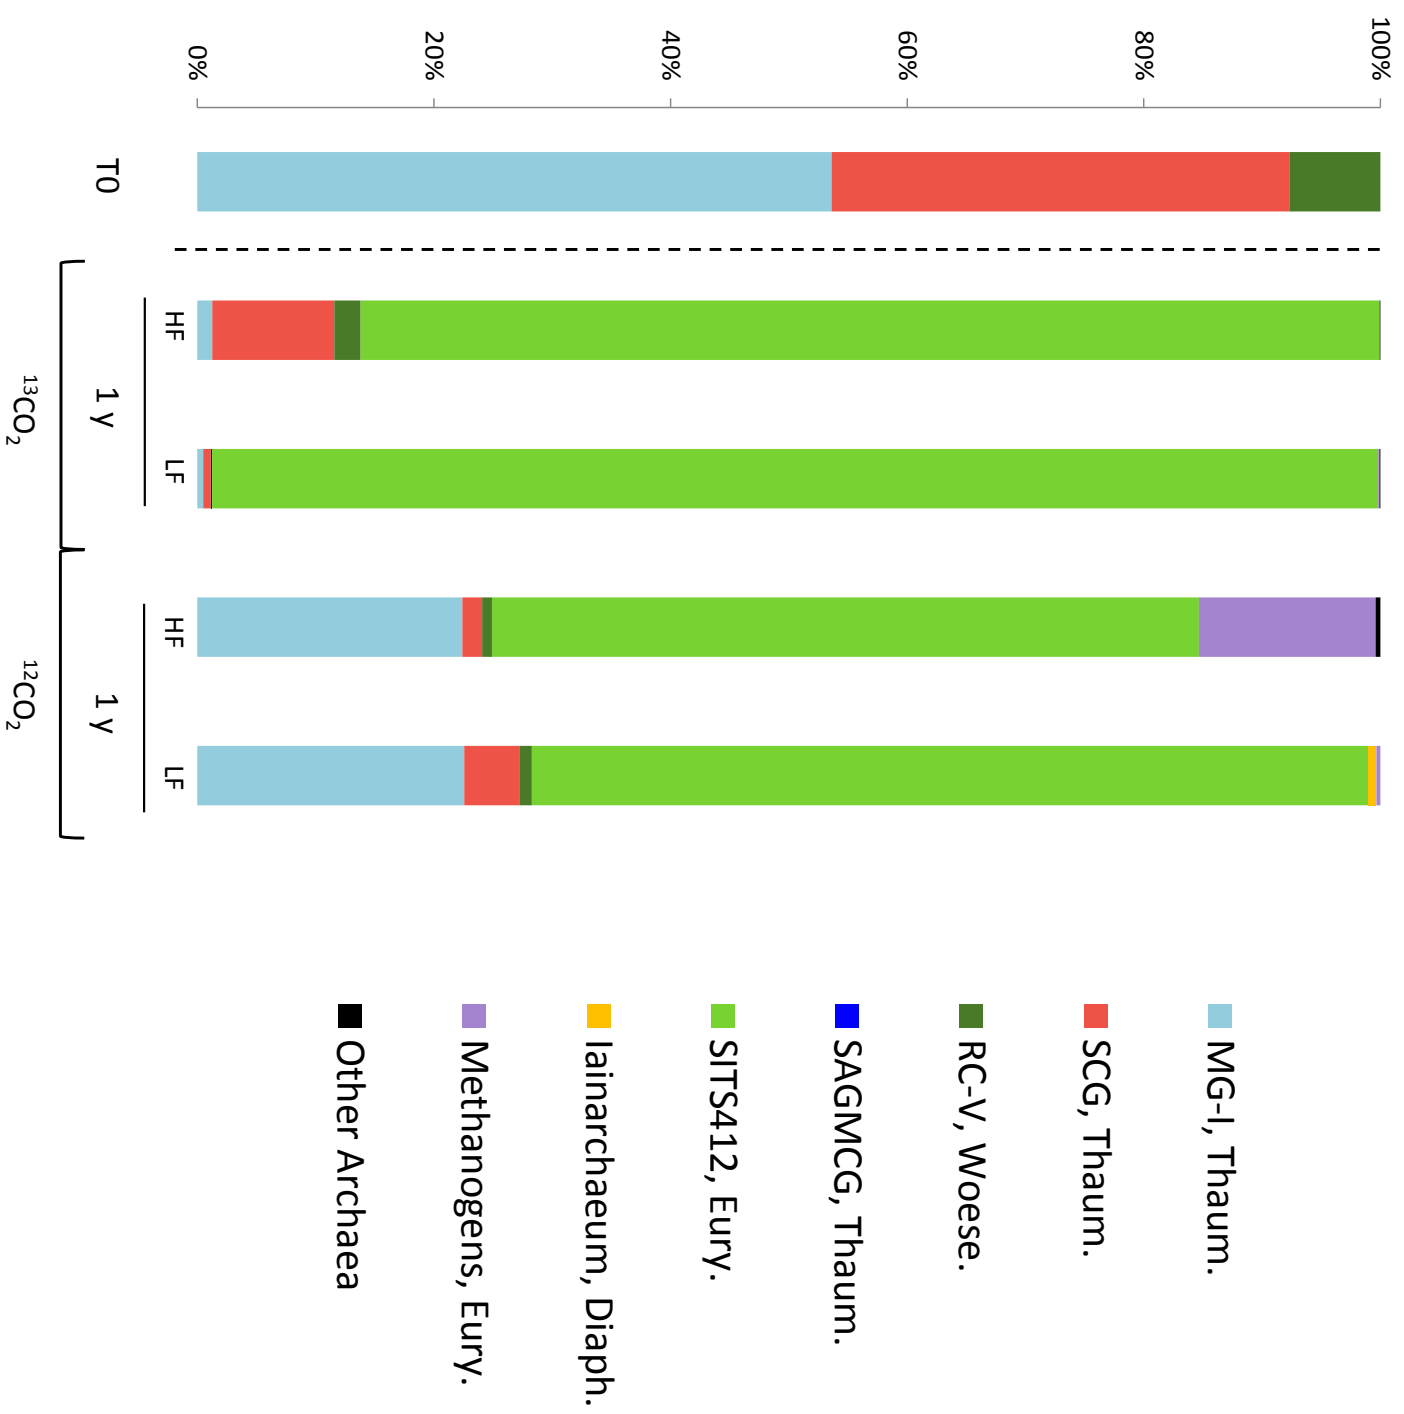

Figure S4.

| Rock core sample ID | Site | Well   | Depth (drilling meter below surface) | Lithostratigraphic unit               | Rock type (limestone type)     | Aquifer type   |
|---------------------|------|--------|--------------------------------------|---------------------------------------|--------------------------------|----------------|
| KS-20               | H3   | H3-1   | 1.70 - 1.80                          | Quaternary                            | Loess                          | Aquitard       |
| KS-38               | H3   | H3-2   | 12.5 – 12.72                         | Upper Muschelkalk, Meissner formation | Limestone (grainstone)         | Joint aquifer  |
| KS-41               | H5   | H5-2/3 | 5.40 – 5.50                          | Lower Keuper, Erfurt formation        | Siltstone                      | Aquitard       |
| KS-3                | H5   | H5-1   | 7.24 – 7.35                          | Lower Keuper, Erfurt formation        | Limestone-marlstone (mudstone) | Aquitard       |
| KS-8                | H5   | H5-1   | 21.30 – 21.60                        | Lower Keuper, Erfurt formation        | Silty sandstone, dolomitic     | Porous aquifer |
| KS-51               | H5   | H5-2/3 | 50.40 – 50.53                        | Upper Muschelkalk, Meissner formation | Limestone (wackestone)         | Joint aquifer  |

Table S1.

| Well sampled | Material incubated | Substrate used for incubation   | Time of incubation | Incubation conditions | Sample ID (bottle #) | # fractions obtained |
|--------------|--------------------|---------------------------------|--------------------|-----------------------|----------------------|----------------------|
| H4-3         | Filter             | <sup>13</sup> C-CO <sub>2</sub> | 1 month            | Anoxic                | B1_4w (Duplicate 1)  | 11                   |
| H4-3         | Filter             | <sup>13</sup> C-CO <sub>2</sub> | 1 month            | Anoxic                | B2_4w (Duplicate 2)  | 11                   |
| H4-3         | Filter             | <sup>12</sup> C-CO <sub>2</sub> | 1 month            | Anoxic                | B3_4w (Control)      | 11                   |
| H4-3         | Filter             | <sup>13</sup> C-CO <sub>2</sub> | 2 months           | Anoxic                | B1_8w (Duplicate 1)  | 11                   |
| H4-3         | Filter             | <sup>13</sup> C-CO <sub>2</sub> | 2 months           | Anoxic                | B2_8w (Duplicate 2)  | 11                   |
| H4-3         | Filter             | <sup>12</sup> C-CO <sub>2</sub> | 2 months           | Anoxic                | B3_8w (Control)      | 11                   |
| H4-3         | Filter             | <sup>13</sup> C-CO <sub>2</sub> | 3 months           | Anoxic                | B1 (Duplicate 1)     | 12                   |
| H4-3         | Filter             | <sup>13</sup> C-CO <sub>2</sub> | 3 months           | Anoxic                | B2 (Duplicate 2)     | 12                   |
| H4-3         | Filter             | <sup>12</sup> C-CO <sub>2</sub> | 3 months           | Anoxic                | B3 (Control)         | 12                   |
| H4-1         | Filter             | <sup>13</sup> C-CO <sub>2</sub> | 1 month            | Oxic                  | B9_4w (Duplicate 1)  | 11                   |
| H4-1         | Filter             | <sup>13</sup> C-CO <sub>2</sub> | 1 month            | Oxic                  | B10_4w (Duplicate 2) | 11                   |
| H4-1         | Filter             | <sup>12</sup> C-CO <sub>2</sub> | 1 month            | Oxic                  | B11_4w (Control)     | 11                   |
| H4-1         | Filter             | <sup>13</sup> C-CO <sub>2</sub> | 2 months           | Oxic                  | B9_8w (Duplicate 1)  | 11                   |
| H4-1         | Filter             | <sup>13</sup> C-CO <sub>2</sub> | 2 months           | Oxic                  | B10_8w (Duplicate 2) | 11                   |
| H4-1         | Filter             | <sup>12</sup> C-CO <sub>2</sub> | 2 months           | Oxic                  | B11_8w (Control)     | 11                   |
| H4-1         | Filter             | <sup>13</sup> C-CO <sub>2</sub> | 3 months           | Oxic                  | B9 (Duplicate 1)     | 12                   |
| H4-1         | Filter             | <sup>13</sup> C-CO <sub>2</sub> | 3 months           | Oxic                  | B10 (Duplicate 2)    | 12                   |
| H4-1         | Filter             | <sup>12</sup> C-CO <sub>2</sub> | 3 months           | Oxic                  | B11 (Control)        | 12                   |
| H4-1         | Filter             | <sup>13</sup> C-Veratric acid   | 3 months           | Oxic                  | B17 (Duplicate 1)    | 11                   |
| H4-1         | Filter             | <sup>13</sup> C-Veratric acid   | 3 months           | Oxic                  | B18 (Duplicate 2)    | 11                   |
| H4-1         | Filter             | <sup>12</sup> C-Veratric acid   | 3 months           | Oxic                  | B19 (Control)        | 11                   |
| H4-1         | Passive sampler    | <sup>13</sup> C-CO <sub>2</sub> | 1 year             | Oxic                  | B2p (Duplicate 1)    | 11                   |
| H4-1         | Passive sampler    | <sup>13</sup> C-CO <sub>2</sub> | 1 year             | Oxic                  | B6p (Duplicate 2)    | 11                   |
| H4-1         | Passive sampler    | <sup>12</sup> C-CO <sub>2</sub> | 1 year             | Oxic                  | B12p (Control)       | 11                   |
| H5-2         | Filter             | <sup>13</sup> C-CO <sub>2</sub> | 5 weeks            | Anoxic                | B11_H5 (Duplicate 1) | 12                   |
| H5-2         | Filter             | <sup>13</sup> C-CO <sub>2</sub> | 5 weeks            | Anoxic                | B12_H5 (Duplicate 2) | 12                   |
| H5-2         | Filter             | <sup>12</sup> C-CO <sub>2</sub> | 5 weeks            | Anoxic                | B13_H5 (Control)     | 12                   |
| H5-1         | Filter             | <sup>13</sup> C-CO <sub>2</sub> | 5 weeks            | Oxic                  | B1_H5 (Duplicate 1)  | 12                   |
| H5-1         | Filter             | <sup>13</sup> C-CO <sub>2</sub> | 5 weeks            | Oxic                  | B2_H5 (Duplicate 2)  | 12                   |
| H5-1         | Filter             | <sup>12</sup> C-CO <sub>2</sub> | 5 weeks            | Oxic                  | B3_H5 (Control)      | 12                   |

Table S2.

|                    |         | Top soil samples |         |         |         |         |         |         |  |
|--------------------|---------|------------------|---------|---------|---------|---------|---------|---------|--|
|                    | H1      | H2a              | H2b     | H3      |         |         |         |         |  |
|                    | RNA (%) | DNA (%)          | RNA (%) | DNA (%) | RNA (%) | DNA (%) | RNA (%) | DNA (%) |  |
| FSCG               | n.a.    | 96.83            | 28.33   | 79.6    | 0       | 0.04    | 0       | 0.01    |  |
| SCG                | n.a.    | 0.45             | 59.38   | 3.65    | 99.87   | 97.72   | 99.94   | 99.14   |  |
| MG-I               | n.a.    | 0                | 0       | 0.04    | 0.01    | 0       | 0       | 0       |  |
| RC-V               | n.a.    | 1.59             | 3.91    | 4.07    | 0.05    | 0.84    | 0.02    | 0.12    |  |
| DHVE-6             | n.a.    | 0                | 0       | 0       | 0.03    | 0.42    | 0       | 0.03    |  |
| Cand. lainarchaeum | n.a.    | 0.23             | 0       | 0       | 0       | 0       | 0       | 0       |  |
| SITS412            | n.a.    | 0.11             | 7.74    | 12.35   | 0.05    | 0.52    | 0.04    | 0.12    |  |
| Hadesarchaea       | n.a.    | 0.45             | 0       | 0.19    | 0       | 0.39    | 0       | 0       |  |
| PSL12              | n.a.    | 0.06             | 0       | 0       | 0       | 0       | 0       | 0       |  |
| VAL-III            | n.a.    | 0                | 0       | 0       | 0.01    | 0       | 0       | 0       |  |
| Methanogens        | n.a.    | 0.17             | 0.4     | 0.08    | 0       | 0.06    | 0       | 0.57    |  |
| VAL-II             | n.a.    | 0.11             | 0.24    | 0.04    | 0       | 0.01    | 0       | 0       |  |
| Total # sequences  | 258     | 1766             | 1257    | 2635    | 19982   | 14223   | 35985   | 23694   |  |

| Rock core samples |                                     |                                             |                                       |                                       |                                              |                                             |
|-------------------|-------------------------------------|---------------------------------------------|---------------------------------------|---------------------------------------|----------------------------------------------|---------------------------------------------|
|                   | H3_1.7-1.8 m<br>Aquitard<br>DNA (%) | H3_12.5-12.72 m<br>Joint aquifer<br>DNA (%) | H5_3.5-4.5-5 m<br>Aquitard<br>DNA (%) | H5_7.24-7.35 m<br>Aquitard<br>DNA (%) | H5_21.16-21.3 m<br>Porous aquifer<br>DNA (%) | H5_50.4-50.53 m<br>Joint aquifer<br>DNA (%) |
| FSCG              | 0.66                                | 0                                           | 0                                     | 0                                     | 0                                            | 0                                           |
| SCG               | 91.21                               | 0                                           | 0.87                                  | 0.58                                  | 0.19                                         | 77.9                                        |
| MG-I              | 1.33                                | 0.09                                        | 0.01                                  | 0                                     | 0                                            | 0                                           |
| RC-V              | 0                                   | 0                                           | 0                                     | 0.04                                  | 0                                            | 0                                           |
| SITS412           | 0.09                                | 0                                           | 2.86                                  | 0                                     | 0                                            | 0                                           |
| Hadesarchaea      | 0                                   | 0                                           | 0.27                                  | 0                                     | 0                                            | 21.54                                       |
| MBG-A             | 0.08                                | 0                                           | 0.24                                  | 56.43                                 | 25.07                                        | 0                                           |
| PSL12             | 0.28                                | 0                                           | 34.06                                 | 2.65                                  | 1.96                                         | 0                                           |
| SAGMCG            | 5.13                                | 99.91                                       | 0.02                                  | 0                                     | 0                                            | 0                                           |
| MCG-6             | 0                                   | 0                                           | 0                                     | 39.66                                 | 0                                            | 0                                           |
| MCG-11            | 0                                   | 0                                           | 0                                     | 0                                     | 72.03                                        | 0                                           |
| VAL-III           | 0                                   | 0                                           | 12.32                                 | 0                                     | 0                                            | 0.01                                        |
| Methanogens       | 0                                   | 0                                           | 0.34                                  | 0                                     | 0                                            | 0.17                                        |
| DSEG              | 0                                   | 0                                           | 39.49                                 | 0                                     | 0                                            | 0                                           |
| MBG-E             | 0                                   | 0                                           | 8.57                                  | 0                                     | 0                                            | 0                                           |
| Group_1.1c        | 0                                   | 0                                           | 0.2                                   | 0.22                                  | 0.59                                         | 0                                           |
| Unclassified      | 1.22                                | 0                                           | 0.75                                  | 0.42                                  | 0.16                                         | 0.38                                        |
| Total # sequences | 11802                               | 77103                                       | 50566                                 | 12551                                 | 61237                                        | 86725                                       |

| Groundwater samples – August 2014 |         |         |         |         |         |         |         |         |      |
|-----------------------------------|---------|---------|---------|---------|---------|---------|---------|---------|------|
|                                   | H3-1    |         | H4-1    |         | H5-1    |         | H3-2    |         |      |
|                                   | RNA (%) | DNA (%) | RNA (%) | DNA (%) | RNA (%) | DNA (%) | RNA (%) | DNA (%) |      |
| FSCG                              | 0       | 0.02    | 0       | 0.1     | n.a.    | 0.04    | 0.14    | 0.21    | 0.61 |
| SCG                               | 0.09    | 0.06    | 0       | 0.13    | n.a.    | 0.04    | 0.02    | 0.21    |      |
| MG-I                              | 81.71   | 80.29   | 48.85   | 41.36   | n.a.    | 32.94   | 4.94    | 4.33    |      |
| RC-V                              | 8.87    | 7.6     | 30.74   | 24.33   | n.a.    | 37.6    | 65.81   | 43.56   |      |
| DHVE-6                            | 0.68    | 5.57    | 9.58    | 13.27   | n.a.    | 19.82   | 12.11   | 31.92   |      |
| Cand. Iainarchaeum                | 0.21    | 0.67    | 5.26    | 2.99    | n.a.    | 3.6     | 1.58    | 2.16    |      |
| SITS412                           | 4.17    | 2.06    | 2.35    | 4.54    | n.a.    | 1.76    | 4.2     | 2.67    |      |
| Hadesarchaea                      | 0       | 0.02    | 0.03    | 0.07    | n.a.    | 0.04    | 0       | 0.16    |      |
| MBG-A                             | 0       | 0       | 0       | 0.4     | n.a.    | 0       | 0.04    | 0       |      |
| PSL12                             | 0       | 0.04    | 0.05    | 0.13    | n.a.    | 0       | 0.27    | 0.33    |      |
| SAGMCG                            | 1.87    | 1.26    | 0.81    | 2.12    | n.a.    | 2.04    | 2.55    | 4.02    |      |
| MCG-6                             | 0       | 0       | 0       | 0       | n.a.    | 0.04    | 0.05    | 0       |      |
| MCG-11                            | 0       | 0       | 0       | 0.67    | n.a.    | 0.08    | 0       | 0.14    |      |
| VAL-III                           | 1.1     | 0.02    | 0.52    | 0       | n.a.    | 0.25    | 4.09    | 0.16    |      |
| Methanogens                       | 0.34    | 1.21    | 0.39    | 4.74    | n.a.    | 0.69    | 0.59    | 5.79    |      |
| DSEG                              | 0       | 0.04    | 0.03    | 0.07    | n.a.    | 0       | 0.02    | 0.03    |      |
| MBG-E                             | 0       | 0       | 0.47    | 0.87    | n.a.    | 0       | 0.26    | 0.21    |      |
| MG-IV                             | 0       | 0.02    | 0       | 0.34    | n.a.    | 0       | 0.04    | 0.34    |      |
| VAL-II                            | 0.71    | 0.67    | 0.65    | 0.74    | n.a.    | 0.37    | 2.93    | 0.89    |      |
| RC-III                            | 0.21    | 0       | 0.21    | 0.64    | n.a.    | 0       | 0       | 0       |      |
| Group_1.1c                        | 0       | 0.17    | 0       | 0.44    | n.a.    | 0.16    | 0.02    | 0.95    |      |
| Unclassified                      | 0.04    | 0.28    | 0.06    | 2.05    | 0       | 0.53    | 0.34    | 1.52    |      |
| Total # sequences                 | 3258    | 4617    | 3822    | 2976    | 182     | 2447    | 9350    | 7046    |      |

| Groundwater samples – August 2014 |         |         |         |         |         |         |         |         |  |
|-----------------------------------|---------|---------|---------|---------|---------|---------|---------|---------|--|
|                                   | H4-2    |         | H4-3    |         | H5-2    |         | H5-3    |         |  |
|                                   | RNA (%) | DNA (%) | RNA (%) | DNA (%) | RNA (%) | DNA (%) | RNA (%) | DNA (%) |  |
| FSCG                              | 0       | 0.07    | 0       | n.a.    | 0       | 0       | 0       | 0       |  |
| SCG                               | 0.12    | 0.11    | 0       | n.a.    | 0.01    | 0.04    | 0       | 0       |  |
| MG-I                              | 1.98    | 2.35    | 1.56    | n.a.    | 27.25   | 23.07   | 91.11   | 84.78   |  |
| RC-V                              | 34.68   | 38.74   | 55.01   | n.a.    | 60.92   | 38.32   | 4.96    | 5.61    |  |
| DHVE-6                            | 9.98    | 34.89   | 29.31   | n.a.    | 8.08    | 23.32   | 0.45    | 3.44    |  |
| Cand. Iainarchaeum                | 36.37   | 3.46    | 5.44    | n.a.    | 0.64    | 1.84    | 0.14    | 0.13    |  |
| SITS412                           | 6.95    | 10.2    | 4.6     | n.a.    | 0.92    | 0.35    | 1.9     | 0.59    |  |
| Hadesarchaea                      | 0       | 0.46    | 0       | n.a.    | 0       | 0.74    | 0       | 0.39    |  |
| MBG-A                             | 0       | 0.14    | 0.02    | n.a.    | 0       | 0       | 0       | 0       |  |
| SAGMCG                            | 0       | 0.39    | 0.23    | n.a.    | 0.52    | 0.64    | 0.23    | 0.31    |  |
| MCG-6                             | 0.29    | 0.25    | 0       | n.a.    | 0       | 0       | 0       | 0       |  |
| MCG-11                            | 0.18    | 0.89    | 0.05    | n.a.    | 0       | 0       | 0.05    | 0       |  |
| VAL-III                           | 4.03    | 0.04    | 0.88    | n.a.    | 0.38    | 0       | 0.05    | 0       |  |
| Methanogens                       | 0.88    | 2.32    | 0.52    | n.a.    | 0.47    | 6.58    | 0.05    | 1.28    |  |
| DSEG                              | 0.29    | 0.14    | 0.36    | n.a.    | 0.08    | 0       | 0       | 0       |  |
| MBG-E                             | 0       | 0.29    | 0.05    | n.a.    | 0.07    | 0       | 0       | 0       |  |
| MG-IV                             | 0       | 0.11    | 0       | n.a.    | 0       | 0.18    | 0       | 0.14    |  |
| VAL-II                            | 0.82    | 3.46    | 1.42    | n.a.    | 0.41    | 1.17    | 0.99    | 1.01    |  |
| RC-III                            | 1.69    | 0.39    | 0.2     | n.a.    | 0       | 0.46    | 0       | 0       |  |
| Group_1.1c                        | 0       | 0.29    | 0       | n.a.    | 0       | 1.13    | 0       | 0.1     |  |
| Unclassified                      | 1.74    | 1.01    | 0.35    | n.a.    | 0.25    | 2.16    | 0.07    | 2.22    |  |
| Total # sequences                 | 1717    | 2803    | 4433    | 188     | 7293    | 2827    | 2216    | 7131    |  |

|                    |       | Groundwater samples – June 2014 |         |         |         |         |         |         |         |
|--------------------|-------|---------------------------------|---------|---------|---------|---------|---------|---------|---------|
|                    |       | H3-1                            |         | H4-1    |         | H5-1    |         | H3-2    |         |
|                    |       | RNA (%)                         | DNA (%) | RNA (%) | DNA (%) | RNA (%) | DNA (%) | RNA (%) | DNA (%) |
| FSCG               | 0.03  | 0.04                            | 0       | 0.29    | 0.01    | 0.44    | 0       | 0.13    | 0.01    |
| SCG                | 0     | 0.02                            | 0       | 0.03    | 0.13    | 0       | 0       | 0.13    | 0.01    |
| MG-I               | 63.29 | 59.98                           | 44.60   | 29.08   | 18.22   | 14.71   | 3.41    | 10.68   |         |
| RC-V               | 26.67 | 15.08                           | 31.49   | 29.02   | 40.65   | 39.28   | 62.11   | 47.35   |         |
| DHVE-6             | 5.01  | 21.78                           | 6.78    | 26.05   | 19.34   | 34.55   | 16.51   | 31.37   |         |
| Cand. lajnarchaeum | 1.05  | 0.78                            | 11.78   | 6.99    | 3.10    | 3.81    | 2.04    | 2.17    |         |
| SITS412            | 0.69  | 0.23                            | 1.07    | 2.65    | 1.28    | 1.16    | 0.68    | 0.91    |         |
| Hadesarchaea       | 0     | 0.01                            | 0       | 0       | 0.05    | 0.03    | 0.10    | 0       |         |
| MBG-A              | 0.01  | 0                               | 0.09    | 0.13    | 0       | 0.13    | 0.06    | 0.08    |         |
| PSL12              | 0.05  | 0.06                            | 0.09    | 0       | 0.06    | 0.06    | 0.06    | 0.10    |         |
| SAGMCG             | 0.61  | 1.32                            | 1.34    | 3.07    | 1.71    | 2.65    | 1.49    | 4.39    |         |
| MCG-6              | 0     | 0.01                            | 0       | 0       | 0.02    | 0.07    | 0       | 0       |         |
| MCG-11             | 0.01  | 0.01                            | 0       | 0       | 0.26    | 0.24    | 0       | 0.03    |         |
| VAL-III            | 0.85  | 0.03                            | 0.71    | 0.10    | 1.15    | 0.30    | 1.59    | 0.06    |         |
| Methanogens        | 0.24  | 0.47                            | 0.89    | 0.39    | 10.38   | 1.14    | 7.91    | 1.53    |         |
| DSEG               | 0.03  | 0.04                            | 0.09    | 0.20    | 0.02    | 0.15    | 0       | 0.13    |         |
| MBG-E              | 0.01  | 0.03                            | 0.27    | 0.75    | 0.01    | 0.04    | 0.13    | 0.09    |         |
| VAL-II             | 1.37  | 0.10                            | 0.80    | 0.52    | 2.69    | 0.86    | 2.47    | 0.50    |         |
| Unclassified       | 0.08  | 0.01                            | 0       | 0.73    | 0.92    | 0.38    | 1.31    | 0.34    |         |
| Total # sequences  | 14333 | 11863                           | 1121    | 3060    | 8190    | 6752    | 3083    | 10001   |         |



| Groundwater samples – June 2014 |         |         |         |         |         |         |         |         |  |
|---------------------------------|---------|---------|---------|---------|---------|---------|---------|---------|--|
|                                 | H4-2    |         | H4-3    |         | H5-2    |         | H5-3    |         |  |
|                                 | RNA (%) | DNA (%) | RNA (%) | DNA (%) | RNA (%) | DNA (%) | RNA (%) | DNA (%) |  |
| SCG                             | 0.07    | 0       | 0       | 0.06    | 0       | 0.05    | 0       | 0       |  |
| MG-I                            | 2.88    | 1.67    | 4.01    | 3.32    | 24.24   | 18.93   | 90.67   | 87.87   |  |
| RC-V                            | 40.45   | 27.92   | 59.36   | 41.44   | 68.13   | 40.85   | 4.48    | 5.78    |  |
| DHVE-6                          | 15.63   | 35.10   | 21.05   | 38.74   | 5.40    | 25.11   | 0.84    | 2.62    |  |
| Cand. laimarchaeum              | 28.11   | 25.76   | 5.27    | 3.89    | 0.14    | 2.30    | 0.19    | 0.09    |  |
| SITS412                         | 2.53    | 3.61    | 4.85    | 7.21    | 0.14    | 0.18    | 1.68    | 0.18    |  |
| Hadesarchaea                    | 0       | 0.08    | 0.05    | 0.06    | 0       | 0.71    | 0       | 0.12    |  |
| MBG-A                           | 0       | 0.13    | 0       | 0.73    | 0       | 0.03    | 0       | 0       |  |
| PSL12                           | 0       | 0.01    | 0       | 0.06    | 0       | 0.03    | 0       | 0       |  |
| SAGMCG                          | 0.19    | 0.08    | 0       | 0.39    | 0.27    | 1.03    | 0.09    | 0.48    |  |
| MCG-6                           | 0.19    | 0.59    | 0.33    | 0.34    | 0       | 0       | 0       | 0       |  |
| MCG-11                          | 0.16    | 0.78    | 0.05    | 0.90    | 0       | 0.15    | 0       | 0.03    |  |
| VAL-III                         | 4.15    | 0.40    | 2.66    | 0.17    | 0.47    | 0.03    | 0.09    | 0.03    |  |
| Methanogens                     | 2.18    | 0.70    | 0.56    | 0.73    | 0.68    | 9.26    | 0       | 0.15    |  |
| DSEG                            | 0.16    | 0.09    | 0.33    | 0.23    | 0       | 0.03    | 0.28    | 0.03    |  |
| MBG-E                           | 0       | 0.18    | 0       | 0.06    | 0       | 0.10    | 0       | 0       |  |
| VAL-II                          | 0.79    | 0.59    | 0.61    | 0.51    | 0.34    | 0.63    | 1.59    | 2.35    |  |
| Unclassified                    | 2.51    | 2.31    | 0.87    | 1.16    | 0.19    | 0.58    | 0.09    | 0.27    |  |
| Total # sequences               | 4312    | 7736    | 2143    | 1776    | 1481    | 3963    | 1072    | 3355    |  |

| Groundwater samples – September 2014 |         |         |         |         |         |         |         |         |  |
|--------------------------------------|---------|---------|---------|---------|---------|---------|---------|---------|--|
|                                      | H3-1    |         | H4-1    |         | H5-1    |         | H3-2    |         |  |
|                                      | RNA (%) | DNA (%) | RNA (%) | DNA (%) | RNA (%) | DNA (%) | RNA (%) | DNA (%) |  |
| FSCG                                 | n.a.    | n.a.    | 0.02    | 0.06    | 0.03    | 0.40    | 0.09    | 0.12    |  |
| SCG                                  | n.a.    | n.a.    | 0.02    | 0.03    | 0.05    | 0.04    | 0.36    | 0.10    |  |
| MG-I                                 | n.a.    | n.a.    | 41.90   | 25.01   | 30.72   | 47.76   | 2.47    | 4.66    |  |
| RC-V                                 | n.a.    | n.a.    | 32.80   | 28.79   | 46.16   | 23.57   | 68.85   | 43.05   |  |
| DHVE-6                               | n.a.    | n.a.    | 10.31   | 25.94   | 14.47   | 17.67   | 8.63    | 40.26   |  |
| Cand. lainarchaeum                   | n.a.    | n.a.    | 6.98    | 4.50    | 2.19    | 2.89    | 4.09    | 2.16    |  |
| SITS412                              | n.a.    | n.a.    | 4.07    | 6.20    | 0.88    | 1.64    | 2.11    | 0.99    |  |
| Hadesarchaea                         | n.a.    | n.a.    | 0       | 0.03    | 0.01    | 0.04    | 0       | 0       |  |
| MBG-A                                | n.a.    | n.a.    | 0.04    | 0.03    | 0.03    | 0.04    | 0       | 0       |  |
| PSL12                                | n.a.    | n.a.    | 0.09    | 0.46    | 0.01    | 0.44    | 0.09    | 0.17    |  |
| SAGMCG                               | n.a.    | n.a.    | 0.72    | 3.69    | 1.71    | 3.28    | 1.66    | 2.93    |  |
| MCG-6                                | n.a.    | n.a.    | 0       | 0       | 0.02    | 0.09    | 0       | 0       |  |
| MCG-11                               | n.a.    | n.a.    | 0       | 0       | 0.05    | 0.36    | 0       | 0.07    |  |
| VAL-III                              | n.a.    | n.a.    | 0.89    | 0.23    | 0.90    | 0.31    | 8.31    | 0.12    |  |
| Methanogens                          | n.a.    | n.a.    | 0.56    | 2.45    | 0.81    | 0.58    | 0.76    | 4.29    |  |
| DSEG                                 | n.a.    | n.a.    | 0.04    | 0       | 0.11    | 0.04    | 0.04    | 0.05    |  |
| MBG-E                                | n.a.    | n.a.    | 0.45    | 0.69    | 0.01    | 0       | 0.09    | 0.07    |  |
| VAL-II                               | n.a.    | n.a.    | 0.96    | 0.78    | 1.71    | 0.44    | 2.34    | 0.36    |  |
| Unclassified                         | n.a.    | n.a.    | 0.15    | 1.11    | 0.13    | 0.41    | 0.11    | 0.6     |  |
| Total # sequences                    | n.a.    | n.a.    | 5528    | 3470    | 15822   | 2253    | 2225    | 4123    |  |

| Groundwater samples – September 2014 |         |         |         |         |         |         |         |         |
|--------------------------------------|---------|---------|---------|---------|---------|---------|---------|---------|
|                                      | H4-2    |         | H4-3    |         | H5-2    |         | H5-3    |         |
|                                      | RNA (%) | DNA (%) | RNA (%) | DNA (%) | RNA (%) | DNA (%) | RNA (%) | DNA (%) |
| FSCG                                 | n.a.    | 0       | 0       | 0       | 0       | 0.03    | n.a.    | 0       |
| SCG                                  | n.a.    | 0       | 0.03    | 0       | 0.05    | 0       | n.a.    | 0.04    |
| MG-I                                 | n.a.    | 1.07    | 0.87    | 1.61    | 96.35   | 39.91   | n.a.    | 93.44   |
| RC-V                                 | n.a.    | 23.43   | 58.65   | 32.02   | 2.17    | 32.62   | n.a.    | 2.85    |
| DHVE-6                               | n.a.    | 26.39   | 21.95   | 53.45   | 0.20    | 23.47   | n.a.    | 1.92    |
| Cand. laimarchaeum                   | n.a.    | 38.54   | 6.47    | 4.90    | 0.05    | 0.94    | n.a.    | 0.06    |
| SITS412                              | n.a.    | 4.92    | 6.87    | 4.38    | 0.53    | 0.26    | n.a.    | 0.22    |
| Hadesarchaea                         | n.a.    | 0.08    | 0       | 0       | 0       | 0.06    | n.a.    | 0.02    |
| MBG-A                                | n.a.    | 0.08    | 0.03    | 0.15    | 0.01    | 0.03    | n.a.    | 0       |
| PSL12                                | n.a.    | 0       | 0       | 0.06    | 0       | 0       | n.a.    | 0       |
| SAGMCG                               | n.a.    | 0.10    | 0.10    | 0.11    | 0.09    | 0.91    | n.a.    | 0.38    |
| MCG-6                                | n.a.    | 0.44    | 0.27    | 0.15    | 0       | 0       | n.a.    | 0       |
| MCG-11                               | n.a.    | 1.33    | 0.05    | 0.47    | 0       | 0.06    | n.a.    | 0       |
| VAL-III                              | n.a.    | 0.56    | 1.35    | 0.18    | 0.05    | 0.09    | n.a.    | 0       |
| Methanogens                          | n.a.    | 0.36    | 0.83    | 0.80    | 0.02    | 0.88    | n.a.    | 0.12    |
| DSEG                                 | n.a.    | 0.18    | 0.10    | 0.44    | 0.02    | 0.09    | n.a.    | 0       |
| MBG-E                                | n.a.    | 0.08    | 0.18    | 0.11    | 0       | 0       | n.a.    | 0       |
| VAL-II                               | n.a.    | 0.56    | 1.22    | 0.54    | 0.43    | 0.35    | n.a.    | 0.89    |
| Unclassified                         | n.a.    | 1.88    | 1.03    | 0.63    | 0.03    | 0.3     | n.a.    | 0.06    |
| Total # sequences                    | n.a.    | 4964    | 7321    | 6649    | 13327   | 3400    | n.a.    | 8324    |

Table S3.

| Month sampled         | Well | Oxygen saturation (%) | NO <sub>3</sub> <sup>-</sup> (mg/L) | NH <sub>4</sub> (mg/L) |
|-----------------------|------|-----------------------|-------------------------------------|------------------------|
| <b>June 2014</b>      | H3-2 | 27.1                  | 27.72                               | 0.04                   |
|                       | H4-2 | 0                     | 0                                   | 0.20                   |
|                       | H4-3 | 0                     | 0                                   | 0.12                   |
|                       | H5-2 | 0                     | 9.56                                | 0.43                   |
|                       | H5-3 | 0                     | 0                                   | 0.75                   |
|                       | H3-1 | 31.9                  | 28.53                               | 0.01                   |
|                       | H4-1 | 37.4                  | 14.50                               | 0.11                   |
|                       | H5-1 | 25.3                  | 12.21                               | 0.10                   |
| <b>August 2014</b>    | H3-2 | 21.7                  | 40.21                               | 0.08                   |
|                       | H4-2 | 0                     | 0                                   | 0.31                   |
|                       | H4-3 | 0                     | 0                                   | 0.20                   |
|                       | H5-2 | 0                     | 0                                   | 0.47                   |
|                       | H5-3 | 0.2                   | 0                                   | 0.77                   |
|                       | H3-1 | 43.3                  | 32.69                               | 0.12                   |
|                       | H4-1 | 43.6                  | 17.06                               | 0.23                   |
|                       | H5-1 | 29.1                  | 15.46                               | 0.01                   |
| <b>September 2014</b> | H3-2 | 17.2                  | 32.33                               | 0                      |
|                       | H4-2 | 0                     | 0                                   | 0.15                   |
|                       | H4-3 | 0                     | 0                                   | 0.05                   |
|                       | H5-2 | 0                     | 0                                   | 0.51                   |
|                       | H5-3 | 0                     | 0                                   | 0.77                   |
|                       | H4-1 | 51                    | 9.84                                | 0.13                   |
|                       | H5-1 | 30.3                  | 8.45                                | 0.03                   |

Table S4.

SIP using filtered groundwater from site H4 (wells H4-1 and H4-3)

|                                    | <sup>13</sup> CO <sub>2</sub> _Duplicate 1_4 weeks_H41 (B9_4w) |      |                |                | <sup>13</sup> CO <sub>2</sub> _Duplicate 2_4 weeks_H41 (B10_4w) |      |                |                | <sup>12</sup> CO <sub>2</sub> _Control 4 weeks_H41 (B11_4w) |                |                |  |
|------------------------------------|----------------------------------------------------------------|------|----------------|----------------|-----------------------------------------------------------------|------|----------------|----------------|-------------------------------------------------------------|----------------|----------------|--|
|                                    | RoOR                                                           | OR   | Heavy Fraction | Light Fraction | RoOR                                                            | OR   | Heavy Fraction | Light Fraction | OR                                                          | Heavy Fraction | Light Fraction |  |
| MG-I (Group 1.1a)_Thaumarchaeota   | 0.71                                                           | 1.14 | 590            | 2227           | 0.81                                                            | 1.30 | 297            | 966            | 1.61                                                        | 206            | 1354           |  |
| RC-V_Woesearchaeota                | 1.32                                                           | 0.89 | 44             | 192            | 0.76                                                            | 0.51 | 17             | 111            | 0.67                                                        | 19             | 201            |  |
| DHVE-6_Woesearchaeota              | 2.07                                                           | 3.44 | 64             | 77             | 1.3                                                             | 2.16 | 24             | 40             | 1.66                                                        | 8              | 36             |  |
| SAGMCG (Group 1.1a)_Thaumarchaeota | 0.91                                                           | 1.18 | 47             | 156            | 2.04                                                            | 2.66 | 36             | 50             | 1.31                                                        | 20             | 115            |  |
| Total # reads                      | na                                                             | na   | 764            | 2974           | na                                                              | na   | 387            | 1347           | na                                                          | 258            | 1903           |  |

|                                    |       | <sup>13</sup> CO2_Duplicate 1_4 weeks_H41 (B9_8w) |                |                |       | <sup>13</sup> CO2_Duplicate 2_4 weeks_H41 (B10_8w) |                |                |      | <sup>12</sup> CO2_Control 4 weeks_H41 (B11_8w) |                |  |  |
|------------------------------------|-------|---------------------------------------------------|----------------|----------------|-------|----------------------------------------------------|----------------|----------------|------|------------------------------------------------|----------------|--|--|
|                                    | RoOR  | OR                                                | Heavy Fraction | Light Fraction | RoOR  | OR                                                 | Heavy Fraction | Light Fraction | OR   | Heavy Fraction                                 | Light Fraction |  |  |
| MG-I (Group 1.1a)_Thaumarchaeota   | 0.06  | 0.37                                              | 1076           | 4193           | 0.11  | 0.69                                               | 455            | 1323           | 6.16 | 224                                            | 63             |  |  |
| DHVE-6_Woeseearchaeota             | 50.19 | 18.02                                             | 53             | 11             | 22.66 | 8.13                                               | 25             | 9              | 0.36 | 5                                              | 5              |  |  |
| SAGMCG (Group 1.1a)_Thaumarchaeota | 4.19  | 1.52                                              | 43             | 103            | 2.76  | 1.00                                               | 16             | 45             | 0.36 | 5                                              | 5              |  |  |
| Total # reads                      | na    | na                                                | 1230           | 4413           | na    | na                                                 | 514            | 1441           | na   | 239                                            | 89             |  |  |

| <sup>13</sup> CO2_Duplicate 1_12 weeks_H41 (B9) |      |      |                |                |      |      |                |                |      |                |                | <sup>13</sup> CO2_Duplicate 2_12 weeks_H41 (B10) |  |  |  |  |  | <sup>12</sup> CO2_Control_12 weeks_H41 (B11) |  |  |  |
|-------------------------------------------------|------|------|----------------|----------------|------|------|----------------|----------------|------|----------------|----------------|--------------------------------------------------|--|--|--|--|--|----------------------------------------------|--|--|--|
|                                                 | RoOR | OR   | Heavy Fraction | Light Fraction | RoOR | OR   | Heavy Fraction | Light Fraction | OR   | Heavy Fraction | Light Fraction |                                                  |  |  |  |  |  |                                              |  |  |  |
| MG-I (Group 1.1a)_Thaumarchaeota                | 0.21 | 0.24 | 1842           | 9972           | 0.14 | 0.16 | 427            | 1827           | 1.11 | 845            | 723            |                                                  |  |  |  |  |  |                                              |  |  |  |
| RC-V_Woesearchaeota                             | 5.23 | 3.39 | 425            | 548            | 6.29 | 4.08 | 134            | 101            | 0.65 | 71             | 92             |                                                  |  |  |  |  |  |                                              |  |  |  |
| DHVE-6_Woesearchaeota                           | 6.57 | 7.83 | 493            | 290            | 5.98 | 7.13 | 132            | 58             | 1.19 | 34             | 25             |                                                  |  |  |  |  |  |                                              |  |  |  |
| SAGMCG (Group 1.1a)_Thaumarchaeota              | 0.91 | 0.99 | 45             | 178            | 1.38 | 1.51 | 19             | 34             | 1.09 | 35             | 28             |                                                  |  |  |  |  |  |                                              |  |  |  |
| Total # reads                                   | na   | na   | 2884           | 11301          | na   | na   | 771            | 2060           | na   | 1021           | 890            |                                                  |  |  |  |  |  |                                              |  |  |  |

| <sup>13</sup> C-V <sub>A</sub> _Duplicate 1_12 weeks_H41 (B17) |      |    |                | <sup>13</sup> C-V <sub>A</sub> _Duplicate 2_12 weeks_H41 (B18) |      |      |                | <sup>12</sup> C-V <sub>A</sub> _Control_12 weeks_H41 (B19) |      |                |                |
|----------------------------------------------------------------|------|----|----------------|----------------------------------------------------------------|------|------|----------------|------------------------------------------------------------|------|----------------|----------------|
|                                                                | ROOR | OR | Heavy Fraction | Light Fraction                                                 | ROOR | OR   | Heavy Fraction | Light Fraction                                             | OR   | Heavy Fraction | Light Fraction |
| MG-I (Group 1.1a)_Thaunarchaeota                               |      | na | na             | na                                                             | 6.26 | 3.94 | 310            | 325                                                        | 0.63 | 103            | 425            |
| RC-V_Woeseearchaeota                                           |      | na | na             | na                                                             | 0.78 | 0.42 | 20             | 58                                                         | 0.54 | 6              | 39             |
| Total # reads                                                  | na   | na | na             | na                                                             | na   | na   | 340            | 449                                                        | na   | 148            | 542            |

| <sup>13</sup> CO <sub>2</sub> Duplicate 1.4 weeks_H43 (B1_4w) |      |      | <sup>13</sup> CO <sub>2</sub> Duplicate 2.4 weeks_H43 (B2_4w) |                |      | <sup>12</sup> CO <sub>2</sub> Control_4 weeks_H43 (B3_4w) |                |                |
|---------------------------------------------------------------|------|------|---------------------------------------------------------------|----------------|------|-----------------------------------------------------------|----------------|----------------|
|                                                               | RoOR | OR   | Heavy Fraction                                                | Light Fraction | RoOR | OR                                                        | Heavy Fraction | Light Fraction |
| MG-I (Group 1.1a)_Thaumarhaeota                               | 0.77 | 1.79 | 170                                                           | 138            | 0.98 | 2.3                                                       | 187            | 368            |
| RC-V_Woesearchaeota                                           | 1.87 | 1.43 | 436                                                           | 468            | 1.43 | 1.09                                                      | 409            | 2002           |
| SITS412_Euryarchaeota                                         | 0.90 | 0.13 | 84                                                            | 610            | 1.41 | 0.20                                                      | 197            | 3194           |
| DHVE-6_Woesearchaeota                                         | 0.68 | 2.62 | 406                                                           | 269            | 1.70 | 6.54                                                      | 366            | 384            |
| Methanogens_Euryarchaeota                                     | 0.40 | 0.53 | 7                                                             | 18             | 2.00 | 2.61                                                      | 13             | 26             |
| Subgroup 11 (MCG-11)_Bathyarchaeota                           |      |      |                                                               |                | 0.90 | 1.05                                                      | 18             | 89             |
| Subgroup 6 (MCG-6)_Bathyarchaeota                             | 8.09 | 1.48 | 13                                                            | 12             | 5.89 | 1.08                                                      | 11             | 53             |
| Total # reads                                                 | na   | na   | 1173                                                          | 1599           | na   | na                                                        | 1277           | 6632           |

| <sup>13</sup> CO <sub>2</sub> Duplicate 1.8 weeks_H43 (B1_8w) |      |      |                | <sup>13</sup> CO <sub>2</sub> Duplicate 2.8 weeks_H43 (B2_8w) |      |      |                | <sup>12</sup> CO <sub>2</sub> Control_8 weeks_H43 (B3_8w) |       |                |                |
|---------------------------------------------------------------|------|------|----------------|---------------------------------------------------------------|------|------|----------------|-----------------------------------------------------------|-------|----------------|----------------|
|                                                               | RoOR | OR   | Heavy Fraction | Light Fraction                                                | RoOR | OR   | Heavy Fraction | Light Fraction                                            | OR    | Heavy Fraction | Light Fraction |
| MG-I (Group 1.1a)_Thaumarhaeota                               | 0.06 | 1.10 | 164            | 310                                                           | 0.15 | 2.87 | 669            | 378                                                       | 18.95 | 277            | 96             |
| RC-V_Woesearchaeota                                           | 0.07 | 0.83 | 322            | 726                                                           | 0.14 | 1.74 | 947            | 869                                                       | 12.66 | 389            | 227            |
| SITS412_Euryarchaeota                                         | 0.07 | 0.07 | 11             | 280                                                           | 0.09 | 0.08 | 246            | 2176                                                      | 0.90  | 62             | 343            |
| DHVE-6_Woesearchaeota                                         | 0.23 | 6.01 | 202            | 89                                                            | 0.19 | 5.13 | 800            | 276                                                       | 26.44 | 309            | 80             |
| MCG subgroups_Bathyarchaeota                                  | 0.37 | 0.48 | 5              | 21                                                            | 0.58 | 0.76 | 35             | 63                                                        | 1.32  | 6              | 23             |
| Total # reads                                                 | na   | na   | 738            | 1508                                                          | na   | na   | 2927           | 4037                                                      | na    | 1124           | 812            |

| <sup>13</sup> CO <sub>2</sub> Duplicate 1.12 weeks_H43 (B1) |      |    |                | <sup>13</sup> CO <sub>2</sub> Duplicate 2.12 weeks_H43 (B2) |      |      |                | <sup>12</sup> CO <sub>2</sub> Control_12 weeks_H43 (B3) |      |                |                |
|-------------------------------------------------------------|------|----|----------------|-------------------------------------------------------------|------|------|----------------|---------------------------------------------------------|------|----------------|----------------|
|                                                             | RoOR | OR | Heavy Fraction | Light Fraction                                              | RoOR | OR   | Heavy Fraction | Light Fraction                                          | OR   | Heavy Fraction | Light Fraction |
| MG-I (Group 1.1a)_Thaumarhaeota                             | na   | na | na             | na                                                          | 0.94 | 1.37 | 252            | 749                                                     | 1.46 | 48             | 15             |
| RC-V_Woesearchaeota                                         | na   | na | na             | na                                                          | 1.04 | 0.66 | 519            | 2685                                                    | 0.63 | 168            | 100            |
| SITS412_Euryarchaeota                                       | na   | na | na             | na                                                          | 2.65 | 0.30 | 159            | 1739                                                    | 0.11 | 17             | 54             |
| DHVE-6_Woesearchaeota                                       | na   | na | na             | na                                                          | 0.79 | 4.41 | 713            | 909                                                     | 5.59 | 270            | 36             |
| Cand. laiarhaeum_Diapherotrites                             | na   | na | na             | na                                                          | 1.84 | 1.56 | 30             | 76                                                      | 0.85 | 25             | 13             |
| Total # reads                                               | na   | na | na             | na                                                          | na   | na   | 1824           | 7161                                                    | na   | 549            | 244            |

SIP using passive sampler material exposed in well H4-1

|                                  | <sup>13</sup> CO <sub>2</sub> _Duplicate 1 (B2p) |    |                |                | <sup>13</sup> CO <sub>2</sub> _Duplicate 2 (B6p) |       |                |                | <sup>12</sup> CO <sub>2</sub> _Control (B12p) |                |                |
|----------------------------------|--------------------------------------------------|----|----------------|----------------|--------------------------------------------------|-------|----------------|----------------|-----------------------------------------------|----------------|----------------|
|                                  | RoOR                                             | OR | Heavy Fraction | Light Fraction | RoOR                                             | OR    | Heavy Fraction | Light Fraction | OR                                            | Heavy Fraction | Light Fraction |
| SITS412_Euryarchaeota            | na                                               | na | na             | na             | 1.68                                             | 0.09  | 1354           | 4595           | 0.05                                          | 144            | 210            |
| MG-I (Group 1.1a)_Thaumarchaeota | na                                               | na | na             | na             | 5.06                                             | 2.60  | 20             | 23             | 0.51                                          | 54             | 67             |
| SCG (Group 1.1b)_Thaumarchaeota  | na                                               | na | na             | na             | 87.46                                            | 17.74 | 162            | 30             | 0.20                                          | 5              | 14             |
| Total # reads                    | na                                               | na | na             | na             | na                                               | na    | 1572           | 4662           | na                                            | 297            | 222            |

SIP using filtered groundwater from site H5 (wells H5-1 and H5-2)

|                                    | <sup>13</sup> CO <sub>2</sub> _Duplicate 1_5 weeks_oxic (B1_H5) |      |                |                | <sup>13</sup> CO <sub>2</sub> _Duplicate 2_12 weeks_oxic (B2_H5) |      |                |                | <sup>12</sup> CO <sub>2</sub> _Control_12 weeks_oxic (B3_H5) |                |                |  |
|------------------------------------|-----------------------------------------------------------------|------|----------------|----------------|------------------------------------------------------------------|------|----------------|----------------|--------------------------------------------------------------|----------------|----------------|--|
|                                    | RoOR                                                            | OR   | Heavy Fraction | Light Fraction | RoOR                                                             | OR   | Heavy Fraction | Light Fraction | OR                                                           | Heavy Fraction | Light Fraction |  |
| MG-I (Group 1.1a)_Thaumarchaeota   | 0.03                                                            | 0.16 | 24264          | 53577          | 0.03                                                             | 0.17 | 31738          | 44817          | 5.5                                                          | 28165          | 12779          |  |
| Unclassified Thaumarchaeota        | 1858.15                                                         | 4.39 | 163            | 81             | 2148.11                                                          | 5.07 | 971            | 258            | 0.0024                                                       | 6              | 1297           |  |
| SAGMCG (Group 1.1a)_Thaumarchaeota | 6899.15                                                         | 8.20 | 158            | 42             | 3738.53                                                          | 4.45 | 258            | 286            | 0.0012                                                       | 5              | 2040           |  |
| Total # reads                      | na                                                              | na   | 24791          | 53763          | na                                                               | na   | 34537          | 45483          | na                                                           | 29619          | 16408          |  |

|                                  | <sup>13</sup> CO <sub>2</sub> _Duplicate 1_5 weeks_anoxic (B11_H5) |        |                |                | <sup>13</sup> CO <sub>2</sub> _Duplicate 2_5 weeks_anoxic (B12_H5) |      |                |                | <sup>12</sup> CO <sub>2</sub> _Control_5 weeks_anoxic (B13_H5) |                |                |  |
|----------------------------------|--------------------------------------------------------------------|--------|----------------|----------------|--------------------------------------------------------------------|------|----------------|----------------|----------------------------------------------------------------|----------------|----------------|--|
|                                  | RoOR                                                               | OR     | Heavy Fraction | Light Fraction | RoOR                                                               | OR   | Heavy Fraction | Light Fraction | OR                                                             | Heavy Fraction | Light Fraction |  |
| MG-I (Group 1.1a)_Thaumarchaeota | 0.01                                                               | 0.04   | 26136          | 27132          | 0.23                                                               | 1.16 | 16703          | 19562          | 5.06                                                           | 29793          | 50545          |  |
| Unclassified Thaumarchaeota      | 943.96                                                             | 443.93 | 2766           | 6              | 1.93                                                               | 0.91 | 422            | 548            | 0.47                                                           | 8              | 29             |  |
| Total # reads                    | na                                                                 | na     | 31131          | 27321          | na                                                                 | na   | 17898          | 21179          | na                                                             | 29832          | 50871          |  |

Table S5.



|      |           |        | DOC (mg/L) |     | DIC (mg/L) |      | O <sub>2</sub> (mg/L) |     | NH <sub>4</sub> <sup>+</sup> (mg/L) |      | NO <sub>3</sub> <sup>-</sup> (mg/L) |      | SO <sub>4</sub> <sup>2-</sup> (mg/L) |       |       |
|------|-----------|--------|------------|-----|------------|------|-----------------------|-----|-------------------------------------|------|-------------------------------------|------|--------------------------------------|-------|-------|
| Well | Substrate | Sample | TO         | Te  | TO         | Te   | TO                    | Te  | TO                                  | Te   | TO                                  | Te   | TO                                   | Te    |       |
| H4-3 | 13CO2_1   | Anoxic | B1         | 4.3 | 2.5        | na   | na                    | na  | na                                  | 0.1  | nd                                  | 0.4  | <0.1                                 | 39.3  | 39.2  |
| H4-3 | 13CO2_2   | Anoxic | B2         | 4.3 | 2.7        | na   | na                    | na  | na                                  | 0.1  | nd                                  | 0.4  | nd                                   | 39.3  | 37.8  |
| H4-3 | 12CO2     | Anoxic | B3         | 4.3 | 2.3        | na   | na                    | na  | na                                  | 0.1  | nd                                  | 0.4  | <0.1                                 | 39.3  | 41.1  |
| H5-2 | 13CO2_1   | Anoxic | B1_H5      | 0.7 | 0.9        | na   | na                    | na  | na                                  | 0.4  | nd                                  | 3.1  | 1.3                                  | 95.3  | 89.7  |
| H5-2 | 13CO2_2   | Anoxic | B2_H5      | 0.7 | 1.8        | na   | na                    | na  | na                                  | 0.4  | <0.1                                | 3.1  | 1.8                                  | 95.3  | 86.4  |
| H5-2 | 12CO2     | Anoxic | B3_H5      | 0.7 | 1.3        | na   | na                    | na  | na                                  | 0.4  | <0.1                                | 3.1  | 0.7                                  | 95.3  | 89    |
| H4-1 | 13CO2_1   | Oxic   | B9         | 1.4 | 2.2        | na   | na                    | 8.6 | 7.9                                 | <0.1 | <0.1                                | 11.6 | 13.4                                 | 104.7 | 111.6 |
| H4-1 | 13CO2_2   | Oxic   | B10        | 1.4 | 2.5        | na   | na                    | 8.6 | 7.8                                 | <0.1 | <0.1                                | 11.6 | 13.7                                 | 104.7 | 115.2 |
| H4-1 | 12CO2     | Oxic   | B11        | 1.4 | 2.2        | na   | na                    | 8.2 | 6.8                                 | <0.1 | <0.1                                | 11.6 | 12.9                                 | 104.7 | 109.6 |
| H4-1 | 13C-VA_1  | Oxic   | B17        | na  | na         | 72.2 | 65.4                  | 8.9 | 7.9                                 | <0.1 | <0.1                                | 11.6 | 11.8                                 | 104.7 | 110.5 |
| H4-1 | 13C-VA_2  | Oxic   | B18        | na  | na         | 72.2 | 66.4                  | 8.8 | 7.8                                 | <0.1 | <0.1                                | 11.6 | 10.9                                 | 104.7 | 107.7 |
| H4-1 | 12C-VA    | Oxic   | B19        | na  | na         | 72.2 | 50.2                  | 8.8 | 7.8                                 | <0.1 | <0.1                                | 11.6 | 10.3                                 | 104.7 | 107.2 |
| H5-1 | 13CO2_1   | Oxic   | B11_H5     | 0.9 | 1.4        | na   | na                    | 8.  | 7.4                                 | <0.1 | <0.1                                | 7    | 6.8                                  | 316.4 | 296.1 |
| H5-1 | 13CO2_2   | Oxic   | B12_H5     | 0.9 | 1.6        | na   | na                    | 8.2 | 7.4                                 | <0.1 | <0.1                                | 7    | 7                                    | 316.4 | 303.1 |
| H5-1 | 12CO2     | Oxic   | B13_H5     | 0.9 | 1.8        | na   | na                    | 8.2 | 8                                   | <0.1 | <0.1                                | 7    | 6.9                                  | 316.4 | 297.8 |

Table S6.
